# Supplementary material for: Betaine inhibits Toll-like receptor 4 responses and restores intestinal microbiota in acute liver failure mice
Source: PubMed Central journal article supplement (PMC7736280; doi:10.1038/s41598-020-78935-6), 2020-12-14
Supplement: 41598_2020_78935_MOESM1_ESM.pdf [file 41598_2020_78935_MOESM1_ESM.pdf]

## Betaine Inhibits Toll-like Receptor 4 Responses and Restores Intestinal Microbiota in Acute Liver Failure Mice

Qian Chen, Yao Wang, Fangzhou Jiao, Chunxia Shi, Maohua Pei, Luwen Wang, and Zuojiang Gong,

Department of Infectious Diseases, Renmin Hospital of Wuhan University, 430060 Wuhan, China

Zuojiang Gong

E-mail: zjgong@163.com

Telephone: +86 027-88041911-88385

Fax: +86 27-88042292

**Table S1: OTU network analyses showed 509 specific OTUs were produced from 15 fecal samples.**

| #OTU ID | normal_4 | betaine_5 | normal_1 | model_4 | normal_5 | model_1 | model_5 | normal_3 | betaine_4 | model_3 | model_2 | normal_2 | betaine_3 | betaine_1 | betaine_2 |
|---------|----------|-----------|----------|---------|----------|---------|---------|----------|-----------|---------|---------|----------|-----------|-----------|-----------|
| OTU434  | 1        | 4         | 3        | 1       | 1        | 4       | 1       | 0        | 0         | 0       | 0       | 0        | 0         | 0         | 0         |
| OTU501  | 0        | 0         | 0        | 1       | 0        | 7       | 3       | 2        | 4         | 1       | 0       | 0        | 0         | 0         | 0         |
| OTU500  | 1        | 1         | 8        | 4       | 27       | 3       | 0       | 1        | 0         | 3       | 1       | 4        | 0         | 0         | 0         |
| OTU503  | 0        | 1         | 0        | 3       | 1        | 1       | 0       | 1        | 0         | 0       | 2       | 0        | 1         | 1         | 0         |
| OTU502  | 0        | 0         | 1        | 0       | 2        | 0       | 0       | 0        | 1         | 0       | 0       | 0        | 0         | 1         | 2         |
| OTU505  | 6        | 22        | 76       | 12      | 52       | 11      | 14      | 1        | 9         | 54      | 5       | 7        | 0         | 28        | 4         |
| OTU504  | 0        | 0         | 3        | 0       | 1        | 0       | 0       | 0        | 0         | 0       | 0       | 0        | 0         | 1         | 0         |
| OTU507  | 53       | 12        | 89       | 18      | 3        | 6       | 7       | 1        | 7         | 1       | 309     | 7        | 12        | 4         | 18        |
| OTU506  | 0        | 0         | 0        | 0       | 0        | 0       | 0       | 1        | 0         | 0       | 0       | 0        | 0         | 1         | 6         |
| OTU509  | 0        | 1         | 3        | 1       | 1        | 0       | 0       | 1        | 0         | 3       | 0       | 0        | 0         | 0         | 1         |
| OTU508  | 0        | 0         | 0        | 0       | 0        | 0       | 0       | 2        | 0         | 0       | 0       | 0        | 0         | 0         | 0         |
| OTU480  | 3        | 0         | 1        | 0       | 0        | 0       | 0       | 0        | 0         | 0       | 0       | 0        | 0         | 0         | 0         |
| OTU481  | 6        | 0         | 1        | 0       | 0        | 0       | 0       | 0        | 0         | 0       | 0       | 1        | 0         | 0         | 0         |
| OTU482  | 0        | 7         | 0        | 0       | 0        | 0       | 0       | 0        | 1         | 0       | 0       | 0        | 1         | 0         | 0         |
| OTU483  | 0        | 0         | 4        | 2       | 1        | 5       | 2       | 1        | 0         | 3       | 3       | 2        | 1         | 0         | 0         |
| OTU484  | 0        | 1         | 0        | 0       | 0        | 0       | 0       | 0        | 1         | 0       | 0       | 0        | 0         | 1         | 0         |
| OTU485  | 1        | 1         | 3        | 3       | 2        | 1       | 1       | 0        | 0         | 5       | 4       | 0        | 3         | 0         | 1         |
| OTU338  | 7        | 3         | 11       | 15      | 3        | 4       | 5       | 4        | 5         | 6       | 6       | 14       | 9         | 8         | 4         |
| OTU339  | 0        | 0         | 0        | 6       | 0        | 4       | 9       | 0        | 0         | 31      | 0       | 4        | 0         | 2         | 2         |
| OTU336  | 3        | 1         | 17       | 6       | 15       | 0       | 4       | 1        | 5         | 6       | 7       | 4        | 3         | 3         | 3         |
| OTU337  | 12       | 43        | 13       | 13      | 12       | 3       | 26      | 15       | 45        | 15      | 8       | 9        | 34        | 20        | 25        |
| OTU334  | 9        | 0         | 30       | 0       | 30       | 0       | 0       | 1        | 2         | 0       | 0       | 17       | 0         | 0         | 0         |
| OTU335  | 1        | 0         | 17       | 0       | 12       | 0       | 0       | 0        | 0         | 0       | 0       | 2        | 0         | 0         | 0         |
| OTU332  | 5        | 12        | 39       | 14      | 4        | 18      | 5       | 7        | 7         | 4       | 12      | 6        | 11        | 3         | 0         |
| OTU333  | 14       | 1         | 12       | 3       | 5        | 10      | 7       | 2        | 6         | 9       | 8       | 0        | 4         | 9         | 7         |
| OTU330  | 6        | 6         | 0        | 1       | 3        | 7       | 2       | 0        | 0         | 2       | 1       | 1        | 3         | 14        | 10        |
| OTU331  | 5        | 8         | 0        | 8       | 0        | 7       | 8       | 3        | 0         | 5       | 6       | 0        | 7         | 1         | 6         |
| OTU349  | 4        | 2         | 9        | 6       | 14       | 14      | 5       | 2        | 3         | 3       | 9       | 5        | 1         | 2         | 1         |

|        |     |     |     |     |     |     |     |     |     |     |     |     |     |     |     |
|--------|-----|-----|-----|-----|-----|-----|-----|-----|-----|-----|-----|-----|-----|-----|-----|
| OTU348 | 2   | 2   | 9   | 3   | 8   | 1   | 6   | 2   | 0   | 2   | 2   | 1   | 9   | 2   | 6   |
| OTU439 | 3   | 0   | 7   | 0   | 11  | 0   | 0   | 0   | 0   | 0   | 0   | 4   | 0   | 0   | 0   |
| OTU438 | 0   | 2   | 0   | 4   | 1   | 0   | 1   | 1   | 0   | 1   | 0   | 3   | 4   | 0   | 1   |
| OTU343 | 0   | 1   | 0   | 4   | 0   | 6   | 8   | 2   | 2   | 2   | 0   | 1   | 4   | 1   | 4   |
| OTU342 | 10  | 11  | 21  | 11  | 28  | 9   | 16  | 10  | 13  | 16  | 4   | 18  | 28  | 14  | 14  |
| OTU341 | 1   | 0   | 16  | 0   | 19  | 0   | 0   | 0   | 0   | 0   | 0   | 11  | 0   | 0   | 0   |
| OTU340 | 0   | 0   | 0   | 0   | 0   | 0   | 1   | 2   | 0   | 0   | 0   | 0   | 1   | 1   | 34  |
| OTU347 | 2   | 0   | 0   | 0   | 1   | 15  | 0   | 0   | 2   | 1   | 3   | 3   | 1   | 0   | 2   |
| OTU346 | 0   | 14  | 0   | 1   | 0   | 0   | 2   | 6   | 0   | 0   | 1   | 4   | 2   | 8   | 3   |
| OTU345 | 6   | 7   | 8   | 2   | 9   | 10  | 1   | 6   | 2   | 4   | 21  | 1   | 1   | 1   | 3   |
| OTU344 | 5   | 2   | 7   | 2   | 2   | 2   | 4   | 1   | 3   | 17  | 7   | 0   | 7   | 6   | 1   |
| OTU158 | 53  | 1   | 108 | 23  | 65  | 92  | 23  | 23  | 1   | 11  | 332 | 23  | 0   | 1   | 2   |
| OTU159 | 22  | 21  | 171 | 20  | 89  | 92  | 14  | 11  | 9   | 37  | 140 | 22  | 2   | 8   | 12  |
| OTU152 | 3   | 0   | 0   | 22  | 0   | 3   | 130 | 13  | 0   | 246 | 1   | 0   | 0   | 0   | 0   |
| OTU153 | 26  | 1   | 134 | 16  | 17  | 1   | 30  | 3   | 3   | 71  | 136 | 5   | 2   | 0   | 5   |
| OTU150 | 86  | 338 | 59  | 86  | 129 | 21  | 86  | 133 | 165 | 59  | 2   | 58  | 76  | 45  | 42  |
| OTU151 | 18  | 1   | 10  | 31  | 3   | 18  | 2   | 116 | 0   | 1   | 159 | 4   | 3   | 2   | 7   |
| OTU156 | 8   | 134 | 41  | 9   | 55  | 6   | 0   | 0   | 0   | 1   | 25  | 9   | 0   | 2   | 2   |
| OTU157 | 74  | 0   | 8   | 0   | 100 | 0   | 0   | 0   | 0   | 0   | 0   | 51  | 0   | 0   | 0   |
| OTU154 | 32  | 104 | 0   | 15  | 0   | 27  | 30  | 35  | 49  | 60  | 30  | 5   | 59  | 177 | 43  |
| OTU155 | 22  | 4   | 90  | 3   | 121 | 9   | 7   | 34  | 0   | 9   | 7   | 34  | 2   | 0   | 1   |
| OTU237 | 3   | 37  | 0   | 1   | 0   | 0   | 5   | 5   | 0   | 12  | 0   | 5   | 6   | 0   | 1   |
| OTU236 | 38  | 8   | 19  | 16  | 21  | 19  | 4   | 5   | 0   | 9   | 25  | 6   | 18  | 0   | 10  |
| OTU235 | 3   | 3   | 5   | 2   | 7   | 1   | 2   | 3   | 3   | 4   | 0   | 2   | 2   | 33  | 4   |
| OTU234 | 11  | 2   | 21  | 25  | 0   | 129 | 13  | 8   | 19  | 30  | 11  | 8   | 9   | 13  | 7   |
| OTU233 | 2   | 39  | 0   | 10  | 3   | 3   | 31  | 52  | 46  | 31  | 7   | 14  | 51  | 4   | 21  |
| OTU232 | 0   | 16  | 0   | 6   | 0   | 2   | 11  | 5   | 1   | 3   | 2   | 18  | 44  | 44  | 72  |
| OTU231 | 0   | 42  | 18  | 8   | 6   | 1   | 5   | 4   | 7   | 6   | 7   | 3   | 17  | 1   | 6   |
| OTU230 | 84  | 0   | 22  | 0   | 11  | 2   | 0   | 3   | 0   | 0   | 3   | 4   | 0   | 0   | 0   |
| OTU239 | 28  | 6   | 48  | 14  | 54  | 8   | 2   | 2   | 10  | 8   | 22  | 6   | 1   | 10  | 3   |
| OTU238 | 162 | 36  | 103 | 52  | 142 | 134 | 16  | 53  | 20  | 56  | 135 | 27  | 29  | 94  | 51  |
| OTU61  | 86  | 137 | 6   | 440 | 42  | 37  | 179 | 845 | 169 | 264 | 95  | 174 | 423 | 184 | 386 |
| OTU60  | 5   | 18  | 0   | 23  | 1   | 1   | 537 | 48  | 927 | 719 | 1   | 8   | 313 | 7   | 358 |
| OTU63  | 0   | 104 | 0   | 6   | 0   | 0   | 3   | 23  | 508 | 6   | 4   | 3   | 13  | 2   | 0   |
| OTU62  | 20  | 821 | 10  | 22  | 9   | 2   | 247 | 7   | 0   | 35  | 11  | 32  | 387 | 0   | 26  |
| OTU65  | 666 | 418 | 150 | 162 | 345 | 172 | 37  | 42  | 193 | 150 | 172 | 96  | 127 | 230 | 104 |
| OTU64  | 218 | 0   | 435 | 0   | 413 | 1   | 0   | 0   | 0   | 0   | 2   | 122 | 0   | 1   | 1   |
| OTU67  | 44  | 60  | 67  | 58  | 60  | 41  | 21  | 34  | 155 | 56  | 58  | 38  | 26  | 435 | 177 |
| OTU66  | 64  | 162 | 20  | 97  | 59  | 72  | 250 | 345 | 141 | 142 | 68  | 89  | 216 | 50  | 180 |
| OTU69  | 5   | 23  | 0   | 0   | 2   | 0   | 1   | 6   | 512 | 0   | 0   | 0   | 8   | 124 | 4   |
| OTU68  | 49  | 553 | 120 | 31  | 17  | 46  | 31  | 20  | 60  | 15  | 38  | 21  | 70  | 165 | 33  |

|        |     |     |     |     |     |     |    |     |     |     |     |     |     |     |     |   |
|--------|-----|-----|-----|-----|-----|-----|----|-----|-----|-----|-----|-----|-----|-----|-----|---|
| OTU471 | 0   | 6   | 0   | 1   | 1   | 0   | 0  | 0   | 0   | 0   | 0   | 0   | 0   | 0   | 0   | 0 |
| OTU470 | 0   | 2   | 0   | 1   | 0   | 0   | 0  | 0   | 1   | 0   | 0   | 1   | 0   | 3   | 4   |   |
| OTU473 | 3   | 0   | 0   | 0   | 0   | 2   | 1  | 0   | 3   | 0   | 1   | 2   | 13  | 1   | 5   |   |
| OTU472 | 0   | 0   | 0   | 3   | 0   | 1   | 0  | 0   | 0   | 1   | 6   | 6   | 0   | 0   | 0   |   |
| OTU475 | 0   | 0   | 0   | 0   | 0   | 0   | 0  | 3   | 0   | 0   | 0   | 0   | 0   | 0   | 0   |   |
| OTU474 | 1   | 0   | 0   | 0   | 0   | 0   | 0  | 0   | 1   | 0   | 0   | 0   | 0   | 1   | 0   |   |
| OTU477 | 0   | 0   | 1   | 1   | 0   | 36  | 0  | 0   | 0   | 0   | 1   | 1   | 0   | 0   | 0   |   |
| OTU476 | 1   | 0   | 3   | 2   | 3   | 2   | 2  | 0   | 0   | 1   | 2   | 1   | 0   | 0   | 0   |   |
| OTU479 | 97  | 4   | 3   | 4   | 13  | 50  | 12 | 6   | 16  | 32  | 23  | 2   | 10  | 0   | 25  |   |
| OTU478 | 0   | 4   | 0   | 2   | 0   | 0   | 0  | 0   | 3   | 2   | 0   | 0   | 0   | 0   | 2   |   |
| OTU208 | 9   | 4   | 3   | 21  | 3   | 80  | 19 | 6   | 16  | 31  | 88  | 4   | 2   | 4   | 3   |   |
| OTU209 | 39  | 8   | 27  | 9   | 55  | 26  | 11 | 11  | 9   | 30  | 17  | 18  | 0   | 3   | 4   |   |
| OTU206 | 88  | 16  | 180 | 18  | 108 | 14  | 36 | 17  | 22  | 24  | 29  | 31  | 29  | 37  | 42  |   |
| OTU207 | 12  | 12  | 2   | 56  | 2   | 18  | 12 | 31  | 2   | 10  | 10  | 25  | 11  | 0   | 7   |   |
| OTU204 | 10  | 55  | 15  | 3   | 5   | 11  | 18 | 6   | 26  | 33  | 11  | 5   | 17  | 77  | 8   |   |
| OTU205 | 38  | 8   | 23  | 22  | 16  | 10  | 30 | 12  | 1   | 40  | 3   | 2   | 2   | 11  | 0   |   |
| OTU202 | 15  | 0   | 71  | 0   | 65  | 0   | 0  | 0   | 0   | 0   | 0   | 25  | 0   | 0   | 0   |   |
| OTU203 | 11  | 0   | 31  | 0   | 66  | 0   | 0  | 0   | 0   | 0   | 1   | 32  | 0   | 0   | 0   |   |
| OTU200 | 0   | 24  | 0   | 42  | 0   | 0   | 2  | 2   | 15  | 3   | 2   | 19  | 18  | 19  | 10  |   |
| OTU201 | 0   | 68  | 0   | 1   | 4   | 16  | 0  | 5   | 0   | 0   | 0   | 0   | 0   | 0   | 0   |   |
| OTU486 | 8   | 41  | 2   | 9   | 0   | 0   | 6  | 3   | 0   | 11  | 0   | 5   | 5   | 5   | 6   |   |
| OTU487 | 0   | 0   | 0   | 0   | 0   | 0   | 0  | 0   | 2   | 0   | 0   | 0   | 0   | 1   | 0   |   |
| OTU372 | 0   | 4   | 0   | 12  | 1   | 5   | 4  | 4   | 1   | 1   | 5   | 6   | 3   | 0   | 4   |   |
| OTU373 | 0   | 1   | 0   | 1   | 0   | 0   | 2  | 9   | 0   | 4   | 3   | 7   | 0   | 0   | 0   |   |
| OTU279 | 28  | 0   | 24  | 0   | 19  | 0   | 0  | 1   | 1   | 0   | 0   | 6   | 0   | 0   | 0   |   |
| OTU278 | 0   | 0   | 26  | 0   | 0   | 2   | 1  | 0   | 1   | 0   | 0   | 0   | 0   | 0   | 1   |   |
| OTU376 | 3   | 0   | 0   | 0   | 0   | 0   | 3  | 11  | 0   | 10  | 1   | 0   | 0   | 0   | 1   |   |
| OTU377 | 2   | 0   | 0   | 3   | 0   | 0   | 0  | 0   | 0   | 0   | 0   | 0   | 0   | 2   | 0   |   |
| OTU374 | 4   | 1   | 1   | 1   | 1   | 3   | 3  | 2   | 0   | 4   | 0   | 11  | 15  | 0   | 2   |   |
| OTU375 | 2   | 9   | 1   | 6   | 6   | 3   | 4  | 0   | 2   | 6   | 2   | 8   | 4   | 2   | 4   |   |
| OTU273 | 10  | 2   | 12  | 2   | 15  | 18  | 6  | 3   | 9   | 14  | 3   | 8   | 12  | 33  | 11  |   |
| OTU272 | 53  | 43  | 22  | 24  | 33  | 38  | 47 | 48  | 155 | 29  | 27  | 18  | 41  | 241 | 86  |   |
| OTU271 | 5   | 4   | 0   | 15  | 1   | 1   | 2  | 39  | 1   | 8   | 1   | 13  | 3   | 0   | 0   |   |
| OTU270 | 2   | 2   | 0   | 10  | 0   | 0   | 9  | 0   | 0   | 1   | 34  | 0   | 9   | 0   | 30  |   |
| OTU277 | 0   | 0   | 0   | 7   | 0   | 60  | 2  | 1   | 2   | 14  | 6   | 4   | 1   | 0   | 5   |   |
| OTU276 | 39  | 0   | 85  | 8   | 43  | 27  | 6  | 1   | 0   | 11  | 19  | 17  | 0   | 0   | 0   |   |
| OTU275 | 9   | 11  | 0   | 8   | 0   | 2   | 5  | 0   | 4   | 17  | 33  | 25  | 1   | 13  | 3   |   |
| OTU274 | 8   | 0   | 5   | 0   | 26  | 0   | 0  | 0   | 0   | 0   | 0   | 19  | 0   | 0   | 0   |   |
| OTU105 | 183 | 88  | 304 | 64  | 269 | 117 | 55 | 40  | 143 | 155 | 133 | 54  | 48  | 170 | 189 |   |
| OTU104 | 16  | 88  | 9   | 126 | 34  | 42  | 74 | 228 | 208 | 17  | 27  | 211 | 331 | 87  | 298 |   |
| OTU107 | 0   | 109 | 0   | 2   | 0   | 0   | 25 | 22  | 167 | 32  | 0   | 2   | 8   | 40  | 22  |   |

|        |      |     |     |     |     |      |      |      |      |      |     |      |     |      |     |
|--------|------|-----|-----|-----|-----|------|------|------|------|------|-----|------|-----|------|-----|
| OTU106 | 17   | 62  | 7   | 237 | 28  | 105  | 208  | 148  | 53   | 63   | 206 | 200  | 264 | 36   | 202 |
| OTU101 | 42   | 1   | 410 | 44  | 31  | 107  | 9    | 1    | 0    | 66   | 13  | 16   | 2   | 2    | 3   |
| OTU100 | 48   | 217 | 49  | 13  | 55  | 0    | 15   | 11   | 4    | 21   | 4   | 61   | 6   | 50   | 40  |
| OTU103 | 15   | 0   | 174 | 31  | 311 | 150  | 16   | 2    | 0    | 37   | 1   | 61   | 0   | 0    | 1   |
| OTU102 | 12   | 0   | 0   | 46  | 2   | 373  | 31   | 31   | 2    | 56   | 0   | 152  | 0   | 4    | 0   |
| OTU109 | 115  | 0   | 243 | 0   | 153 | 0    | 0    | 0    | 0    | 0    | 0   | 29   | 0   | 0    | 0   |
| OTU108 | 93   | 12  | 34  | 37  | 65  | 122  | 91   | 12   | 35   | 256  | 22  | 26   | 39  | 113  | 115 |
| OTU295 | 3    | 0   | 0   | 2   | 0   | 35   | 8    | 3    | 1    | 17   | 0   | 3    | 0   | 0    | 0   |
| OTU294 | 2    | 15  | 1   | 8   | 0   | 1    | 7    | 11   | 14   | 3    | 2   | 2    | 13  | 8    | 10  |
| OTU297 | 0    | 0   | 3   | 1   | 8   | 3    | 3    | 0    | 0    | 2    | 4   | 6    | 0   | 1    | 1   |
| OTU296 | 20   | 0   | 30  | 1   | 4   | 4    | 0    | 0    | 3    | 4    | 3   | 2    | 2   | 0    | 1   |
| OTU291 | 11   | 7   | 16  | 9   | 11  | 15   | 4    | 3    | 5    | 9    | 23  | 1    | 4   | 8    | 1   |
| OTU290 | 33   | 21  | 22  | 17  | 14  | 17   | 28   | 2    | 6    | 34   | 14  | 9    | 5   | 4    | 9   |
| OTU293 | 14   | 2   | 4   | 1   | 9   | 0    | 2    | 4    | 2    | 2    | 2   | 15   | 3   | 3    | 2   |
| OTU292 | 0    | 1   | 0   | 6   | 0   | 0    | 3    | 53   | 0    | 2    | 1   | 10   | 2   | 0    | 0   |
| OTU299 | 11   | 2   | 7   | 4   | 12  | 3    | 1    | 4    | 11   | 11   | 15  | 5    | 7   | 9    | 6   |
| OTU298 | 2    | 12  | 22  | 8   | 15  | 6    | 15   | 4    | 5    | 8    | 9   | 3    | 4   | 19   | 1   |
| OTU198 | 33   | 10  | 28  | 9   | 2   | 11   | 46   | 10   | 3    | 20   | 41  | 18   | 7   | 8    | 3   |
| OTU199 | 0    | 2   | 0   | 0   | 0   | 0    | 0    | 0    | 1    | 0    | 0   | 0    | 1   | 53   | 0   |
| OTU196 | 458  | 0   | 102 | 2   | 85  | 0    | 0    | 0    | 0    | 0    | 0   | 401  | 0   | 2    | 0   |
| OTU197 | 1    | 76  | 0   | 12  | 1   | 0    | 23   | 2    | 26   | 3    | 4   | 3    | 44  | 9    | 9   |
| OTU194 | 1    | 0   | 3   | 19  | 4   | 4    | 25   | 6    | 0    | 68   | 2   | 0    | 0   | 0    | 0   |
| OTU195 | 12   | 12  | 34  | 1   | 57  | 16   | 0    | 0    | 0    | 3    | 0   | 4    | 9   | 0    | 8   |
| OTU192 | 14   | 8   | 24  | 19  | 57  | 14   | 12   | 8    | 12   | 15   | 5   | 24   | 24  | 69   | 22  |
| OTU193 | 89   | 0   | 29  | 0   | 26  | 0    | 0    | 0    | 0    | 0    | 0   | 5    | 0   | 0    | 0   |
| OTU190 | 11   | 0   | 84  | 0   | 6   | 0    | 0    | 0    | 0    | 0    | 0   | 0    | 0   | 0    | 0   |
| OTU191 | 16   | 7   | 36  | 40  | 17  | 37   | 54   | 7    | 0    | 22   | 35  | 41   | 92  | 1    | 57  |
| OTU38  | 2    | 7   | 55  | 952 | 6   | 143  | 1108 | 498  | 1    | 1167 | 3   | 1568 | 0   | 0    | 5   |
| OTU39  | 281  | 347 | 317 | 85  | 767 | 20   | 84   | 389  | 1660 | 96   | 47  | 608  | 229 | 1120 | 192 |
| OTU36  | 204  | 177 | 177 | 636 | 236 | 135  | 564  | 785  | 21   | 306  | 34  | 470  | 199 | 147  | 115 |
| OTU37  | 128  | 5   | 873 | 1   | 381 | 21   | 4    | 2    | 0    | 13   | 10  | 22   | 0   | 20   | 3   |
| OTU34  | 47   | 223 | 8   | 74  | 4   | 8    | 149  | 275  | 1507 | 186  | 2   | 12   | 46  | 1248 | 11  |
| OTU35  | 1344 | 102 | 528 | 108 | 356 | 1209 | 122  | 75   | 304  | 845  | 533 | 101  | 77  | 63   | 126 |
| OTU32  | 47   | 377 | 0   | 374 | 45  | 12   | 443  | 509  | 353  | 182  | 32  | 123  | 512 | 539  | 740 |
| OTU33  | 28   | 9   | 113 | 6   | 64  | 9    | 153  | 15   | 17   | 104  | 3   | 61   | 826 | 1    | 29  |
| OTU30  | 456  | 5   | 952 | 523 | 587 | 86   | 40   | 99   | 21   | 13   | 73  | 508  | 77  | 452  | 40  |
| OTU31  | 165  | 100 | 536 | 493 | 276 | 46   | 491  | 1060 | 55   | 296  | 40  | 383  | 266 | 5    | 131 |
| OTU371 | 11   | 1   | 7   | 2   | 26  | 2    | 2    | 0    | 0    | 0    | 0   | 4    | 2   | 1    | 2   |
| OTU435 | 23   | 2   | 0   | 8   | 2   | 67   | 67   | 5    | 0    | 229  | 9   | 7    | 4   | 0    | 2   |
| OTU378 | 6    | 2   | 0   | 0   | 0   | 0    | 0    | 1    | 0    | 11   | 2   | 0    | 2   | 0    | 1   |
| OTU379 | 0    | 0   | 0   | 0   | 0   | 10   | 1    | 11   | 0    | 0    | 0   | 0    | 0   | 0    | 0   |

|        |     |     |     |     |     |     |     |     |     |     |     |     |     |     |     |
|--------|-----|-----|-----|-----|-----|-----|-----|-----|-----|-----|-----|-----|-----|-----|-----|
| OTU83  | 33  | 175 | 5   | 66  | 14  | 11  | 59  | 83  | 300 | 79  | 6   | 56  | 139 | 131 | 50  |
| OTU82  | 79  | 117 | 44  | 69  | 66  | 73  | 54  | 125 | 386 | 67  | 76  | 77  | 106 | 631 | 128 |
| OTU81  | 2   | 1   | 376 | 21  | 254 | 35  | 33  | 80  | 56  | 14  | 261 | 151 | 23  | 26  | 66  |
| OTU80  | 45  | 39  | 14  | 404 | 35  | 225 | 61  | 87  | 11  | 27  | 283 | 246 | 58  | 52  | 43  |
| OTU87  | 5   | 2   | 1   | 221 | 15  | 11  | 71  | 70  | 6   | 52  | 765 | 2   | 54  | 5   | 27  |
| OTU86  | 253 | 557 | 0   | 55  | 8   | 40  | 72  | 12  | 74  | 95  | 55  | 18  | 116 | 37  | 162 |
| OTU85  | 35  | 37  | 0   | 256 | 16  | 3   | 186 | 80  | 37  | 76  | 38  | 52  | 77  | 39  | 91  |
| OTU84  | 250 | 108 | 297 | 6   | 317 | 28  | 4   | 24  | 22  | 27  | 121 | 39  | 6   | 28  | 20  |
| OTU89  | 28  | 105 | 20  | 38  | 33  | 21  | 102 | 379 | 45  | 52  | 14  | 26  | 51  | 67  | 38  |
| OTU88  | 8   | 133 | 0   | 12  | 7   | 0   | 37  | 19  | 193 | 45  | 1   | 5   | 228 | 198 | 451 |
| OTU329 | 10  | 0   | 14  | 0   | 1   | 0   | 0   | 0   | 0   | 0   | 0   | 1   | 0   | 0   | 0   |
| OTU328 | 3   | 6   | 5   | 5   | 8   | 3   | 7   | 4   | 11  | 4   | 1   | 5   | 6   | 6   | 9   |
| OTU499 | 0   | 3   | 1   | 1   | 3   | 1   | 2   | 0   | 0   | 1   | 1   | 2   | 0   | 0   | 0   |
| OTU498 | 0   | 1   | 0   | 4   | 0   | 1   | 1   | 0   | 0   | 0   | 0   | 0   | 1   | 0   | 1   |
| OTU325 | 17  | 2   | 0   | 3   | 0   | 6   | 4   | 2   | 0   | 3   | 1   | 1   | 21  | 0   | 10  |
| OTU324 | 4   | 0   | 103 | 0   | 214 | 0   | 1   | 0   | 8   | 0   | 0   | 18  | 0   | 2   | 0   |
| OTU327 | 1   | 0   | 1   | 10  | 0   | 0   | 1   | 1   | 0   | 3   | 1   | 1   | 1   | 2   | 1   |
| OTU326 | 1   | 0   | 0   | 12  | 1   | 2   | 5   | 11  | 1   | 14  | 1   | 20  | 7   | 0   | 3   |
| OTU321 | 0   | 0   | 16  | 0   | 2   | 0   | 0   | 0   | 0   | 0   | 0   | 2   | 0   | 0   | 0   |
| OTU320 | 0   | 5   | 0   | 3   | 0   | 7   | 0   | 0   | 1   | 0   | 1   | 27  | 8   | 0   | 1   |
| OTU323 | 15  | 3   | 10  | 9   | 0   | 19  | 10  | 3   | 9   | 8   | 6   | 9   | 6   | 16  | 1   |
| OTU322 | 0   | 0   | 0   | 0   | 0   | 0   | 0   | 0   | 0   | 0   | 0   | 0   | 0   | 20  | 1   |
| OTU408 | 2   | 0   | 2   | 1   | 1   | 2   | 0   | 0   | 0   | 2   | 4   | 0   | 0   | 1   | 0   |
| OTU409 | 0   | 0   | 1   | 0   | 0   | 3   | 3   | 0   | 0   | 1   | 1   | 1   | 0   | 1   | 0   |
| OTU400 | 3   | 2   | 1   | 0   | 0   | 5   | 1   | 1   | 0   | 0   | 2   | 1   | 3   | 1   | 4   |
| OTU401 | 5   | 0   | 0   | 2   | 0   | 0   | 11  | 3   | 0   | 19  | 2   | 3   | 0   | 0   | 1   |
| OTU402 | 3   | 0   | 2   | 3   | 2   | 2   | 1   | 0   | 4   | 1   | 0   | 3   | 1   | 1   | 2   |
| OTU403 | 5   | 2   | 12  | 2   | 5   | 8   | 3   | 0   | 4   | 5   | 7   | 1   | 0   | 3   | 2   |
| OTU404 | 0   | 1   | 0   | 0   | 0   | 0   | 5   | 0   | 2   | 3   | 1   | 0   | 1   | 4   | 0   |
| OTU405 | 1   | 1   | 2   | 6   | 3   | 5   | 4   | 0   | 1   | 3   | 0   | 4   | 2   | 1   | 2   |
| OTU406 | 0   | 0   | 0   | 0   | 0   | 0   | 0   | 0   | 0   | 1   | 6   | 6   | 0   | 0   | 0   |
| OTU407 | 161 | 1   | 3   | 43  | 10  | 211 | 27  | 135 | 90  | 27  | 39  | 80  | 77  | 473 | 70  |
| OTU149 | 9   | 0   | 13  | 1   | 12  | 0   | 0   | 0   | 127 | 0   | 0   | 7   | 1   | 30  | 100 |
| OTU148 | 94  | 71  | 23  | 70  | 24  | 159 | 27  | 35  | 34  | 26  | 61  | 35  | 26  | 19  | 32  |
| OTU141 | 69  | 0   | 0   | 3   | 2   | 158 | 6   | 14  | 0   | 22  | 13  | 19  | 0   | 0   | 1   |
| OTU140 | 107 | 63  | 110 | 60  | 42  | 1   | 61  | 8   | 93  | 42  | 1   | 48  | 44  | 31  | 29  |
| OTU143 | 29  | 78  | 14  | 13  | 23  | 12  | 108 | 28  | 15  | 29  | 3   | 21  | 42  | 45  | 32  |
| OTU142 | 23  | 11  | 0   | 2   | 4   | 3   | 6   | 9   | 134 | 7   | 6   | 2   | 4   | 1   | 2   |
| OTU145 | 5   | 15  | 0   | 71  | 2   | 10  | 31  | 1   | 0   | 120 | 442 | 11  | 0   | 1   | 0   |
| OTU144 | 16  | 10  | 5   | 18  | 28  | 6   | 31  | 24  | 18  | 6   | 3   | 34  | 47  | 98  | 82  |
| OTU147 | 2   | 3   | 105 | 3   | 126 | 58  | 4   | 2   | 0   | 17  | 4   | 19  | 5   | 0   | 1   |

|        |     |     |     |     |     |     |     |     |     |     |     |     |     |     |     |
|--------|-----|-----|-----|-----|-----|-----|-----|-----|-----|-----|-----|-----|-----|-----|-----|
| OTU146 | 5   | 65  | 1   | 1   | 4   | 3   | 122 | 1   | 152 | 88  | 4   | 5   | 34  | 57  | 11  |
| OTU390 | 2   | 0   | 14  | 2   | 8   | 0   | 0   | 1   | 3   | 4   | 3   | 14  | 0   | 0   | 0   |
| OTU391 | 5   | 0   | 0   | 0   | 0   | 0   | 4   | 0   | 0   | 12  | 1   | 2   | 0   | 6   | 3   |
| OTU392 | 2   | 2   | 5   | 6   | 4   | 10  | 1   | 2   | 0   | 2   | 3   | 4   | 0   | 3   | 1   |
| OTU393 | 8   | 0   | 8   | 0   | 3   | 0   | 0   | 0   | 0   | 0   | 0   | 2   | 0   | 0   | 0   |
| OTU394 | 3   | 1   | 0   | 1   | 0   | 0   | 1   | 0   | 5   | 0   | 0   | 1   | 2   | 1   | 0   |
| OTU395 | 1   | 4   | 0   | 1   | 2   | 0   | 0   | 1   | 2   | 0   | 0   | 3   | 5   | 4   | 2   |
| OTU396 | 3   | 0   | 5   | 0   | 1   | 0   | 0   | 0   | 0   | 0   | 0   | 1   | 0   | 0   | 0   |
| OTU397 | 7   | 0   | 9   | 10  | 6   | 12  | 2   | 1   | 0   | 3   | 6   | 7   | 0   | 1   | 0   |
| OTU398 | 10  | 6   | 69  | 2   | 1   | 308 | 2   | 1   | 116 | 1   | 7   | 1   | 3   | 1   | 0   |
| OTU399 | 1   | 1   | 6   | 0   | 12  | 0   | 3   | 0   | 0   | 0   | 0   | 6   | 1   | 1   | 0   |
| OTU437 | 39  | 7   | 17  | 7   | 8   | 9   | 13  | 18  | 14  | 15  | 2   | 6   | 12  | 2   | 45  |
| OTU436 | 9   | 3   | 229 | 47  | 94  | 46  | 57  | 4   | 42  | 6   | 98  | 8   | 29  | 3   | 16  |
| OTU431 | 0   | 0   | 4   | 0   | 12  | 0   | 0   | 0   | 0   | 0   | 0   | 0   | 0   | 0   | 0   |
| OTU430 | 0   | 1   | 0   | 3   | 0   | 0   | 0   | 1   | 2   | 1   | 0   | 2   | 2   | 2   | 4   |
| OTU242 | 19  | 13  | 43  | 9   | 10  | 19  | 5   | 1   | 17  | 4   | 11  | 7   | 15  | 28  | 32  |
| OTU243 | 0   | 0   | 0   | 1   | 0   | 0   | 0   | 0   | 38  | 0   | 0   | 0   | 4   | 2   | 1   |
| OTU240 | 10  | 0   | 43  | 0   | 37  | 0   | 0   | 0   | 0   | 0   | 0   | 1   | 0   | 0   | 0   |
| OTU241 | 19  | 0   | 37  | 0   | 31  | 0   | 0   | 0   | 0   | 0   | 0   | 59  | 0   | 0   | 0   |
| OTU246 | 22  | 6   | 22  | 11  | 8   | 23  | 11  | 1   | 23  | 23  | 17  | 14  | 22  | 18  | 39  |
| OTU247 | 15  | 4   | 11  | 55  | 6   | 5   | 10  | 8   | 34  | 14  | 110 | 2   | 1   | 14  | 2   |
| OTU244 | 1   | 3   | 0   | 5   | 0   | 56  | 0   | 0   | 4   | 5   | 0   | 0   | 1   | 0   | 1   |
| OTU245 | 3   | 8   | 102 | 21  | 12  | 61  | 6   | 1   | 0   | 13  | 93  | 10  | 8   | 0   | 5   |
| OTU248 | 33  | 0   | 5   | 19  | 7   | 0   | 46  | 0   | 0   | 40  | 1   | 3   | 2   | 0   | 0   |
| OTU249 | 34  | 0   | 41  | 0   | 33  | 0   | 0   | 1   | 1   | 0   | 0   | 26  | 0   | 0   | 0   |
| OTU433 | 76  | 0   | 119 | 0   | 265 | 1   | 5   | 0   | 1   | 0   | 0   | 12  | 1   | 2   | 5   |
| OTU72  | 31  | 58  | 9   | 52  | 19  | 9   | 26  | 156 | 37  | 37  | 15  | 43  | 76  | 345 | 65  |
| OTU73  | 16  | 8   | 245 | 18  | 508 | 2   | 25  | 20  | 11  | 8   | 4   | 40  | 16  | 15  | 11  |
| OTU70  | 234 | 107 | 55  | 450 | 130 | 556 | 73  | 54  | 54  | 162 | 445 | 123 | 126 | 86  | 120 |
| OTU71  | 141 | 15  | 461 | 55  | 221 | 134 | 75  | 17  | 48  | 124 | 106 | 27  | 36  | 43  | 140 |
| OTU76  | 120 | 26  | 0   | 29  | 4   | 200 | 108 | 25  | 0   | 53  | 3   | 73  | 138 | 12  | 318 |
| OTU77  | 214 | 125 | 110 | 91  | 59  | 65  | 50  | 39  | 139 | 116 | 75  | 58  | 81  | 260 | 116 |
| OTU74  | 115 | 59  | 55  | 99  | 61  | 99  | 74  | 35  | 151 | 236 | 83  | 28  | 72  | 288 | 216 |
| OTU75  | 22  | 12  | 414 | 57  | 26  | 98  | 8   | 20  | 3   | 15  | 482 | 35  | 3   | 3   | 5   |
| OTU78  | 59  | 1   | 0   | 382 | 7   | 269 | 96  | 4   | 0   | 40  | 744 | 35  | 0   | 0   | 0   |
| OTU79  | 78  | 21  | 0   | 97  | 1   | 19  | 205 | 35  | 106 | 105 | 32  | 60  | 63  | 87  | 65  |
| OTU432 | 2   | 4   | 0   | 0   | 0   | 1   | 5   | 0   | 6   | 1   | 2   | 1   | 1   | 0   | 3   |
| OTU448 | 82  | 311 | 2   | 132 | 7   | 283 | 57  | 111 | 5   | 5   | 30  | 28  | 46  | 15  | 57  |
| OTU449 | 0   | 0   | 0   | 4   | 1   | 38  | 2   | 2   | 0   | 3   | 0   | 19  | 4   | 4   | 5   |
| OTU444 | 1   | 3   | 0   | 2   | 0   | 4   | 1   | 0   | 0   | 3   | 5   | 3   | 0   | 0   | 1   |
| OTU445 | 0   | 0   | 0   | 0   | 0   | 1   | 0   | 0   | 0   | 0   | 3   | 0   | 0   | 0   | 0   |

|        |     |     |     |     |     |     |     |     |     |     |     |     |     |     |     |
|--------|-----|-----|-----|-----|-----|-----|-----|-----|-----|-----|-----|-----|-----|-----|-----|
| OTU446 | 0   | 0   | 0   | 2   | 1   | 4   | 2   | 1   | 0   | 1   | 1   | 0   | 0   | 0   | 0   |
| OTU447 | 0   | 0   | 0   | 0   | 0   | 0   | 0   | 0   | 0   | 0   | 0   | 1   | 0   | 0   | 0   |
| OTU440 | 73  | 0   | 0   | 13  | 0   | 4   | 81  | 2   | 0   | 55  | 13  | 1   | 3   | 1   | 4   |
| OTU441 | 0   | 6   | 0   | 0   | 0   | 1   | 0   | 0   | 0   | 0   | 0   | 0   | 0   | 0   | 0   |
| OTU442 | 5   | 1   | 4   | 2   | 4   | 3   | 2   | 0   | 2   | 0   | 5   | 3   | 3   | 1   | 1   |
| OTU443 | 4   | 4   | 5   | 1   | 0   | 5   | 0   | 1   | 8   | 0   | 3   | 3   | 2   | 0   | 0   |
| OTU219 | 63  | 1   | 43  | 8   | 163 | 34  | 10  | 9   | 3   | 13  | 5   | 12  | 0   | 2   | 0   |
| OTU218 | 5   | 0   | 52  | 0   | 54  | 0   | 0   | 0   | 0   | 0   | 0   | 42  | 0   | 0   | 1   |
| OTU215 | 43  | 57  | 2   | 36  | 17  | 6   | 21  | 63  | 99  | 12  | 6   | 34  | 76  | 38  | 48  |
| OTU214 | 4   | 0   | 32  | 0   | 71  | 0   | 0   | 0   | 0   | 0   | 0   | 67  | 0   | 0   | 0   |
| OTU217 | 24  | 127 | 6   | 53  | 19  | 31  | 76  | 138 | 118 | 44  | 17  | 82  | 203 | 83  | 68  |
| OTU216 | 11  | 37  | 10  | 21  | 8   | 17  | 23  | 14  | 45  | 50  | 8   | 22  | 58  | 9   | 17  |
| OTU211 | 4   | 9   | 9   | 0   | 39  | 0   | 1   | 0   | 0   | 5   | 0   | 42  | 0   | 0   | 0   |
| OTU210 | 111 | 36  | 133 | 19  | 51  | 167 | 16  | 10  | 4   | 33  | 45  | 29  | 1   | 6   | 6   |
| OTU213 | 30  | 33  | 106 | 55  | 104 | 82  | 23  | 24  | 24  | 43  | 135 | 30  | 21  | 16  | 23  |
| OTU212 | 1   | 20  | 40  | 3   | 30  | 0   | 12  | 21  | 14  | 2   | 0   | 36  | 8   | 0   | 1   |
| OTU496 | 1   | 0   | 6   | 0   | 7   | 0   | 0   | 0   | 0   | 0   | 0   | 3   | 0   | 0   | 0   |
| OTU361 | 3   | 1   | 6   | 3   | 2   | 25  | 4   | 1   | 0   | 12  | 26  | 4   | 0   | 0   | 0   |
| OTU360 | 0   | 4   | 1   | 3   | 3   | 4   | 0   | 3   | 0   | 0   | 0   | 1   | 9   | 22  | 1   |
| OTU363 | 1   | 0   | 0   | 1   | 0   | 26  | 1   | 0   | 2   | 15  | 0   | 0   | 1   | 1   | 3   |
| OTU362 | 0   | 2   | 0   | 2   | 0   | 2   | 1   | 2   | 2   | 3   | 0   | 10  | 4   | 2   | 4   |
| OTU365 | 3   | 0   | 2   | 1   | 1   | 42  | 0   | 0   | 7   | 0   | 4   | 1   | 0   | 1   | 0   |
| OTU364 | 313 | 453 | 57  | 230 | 15  | 19  | 116 | 174 | 9   | 321 | 31  | 135 | 84  | 109 | 121 |
| OTU367 | 5   | 14  | 0   | 5   | 0   | 0   | 1   | 1   | 0   | 2   | 3   | 1   | 0   | 1   | 2   |
| OTU366 | 3   | 0   | 8   | 0   | 3   | 0   | 0   | 0   | 0   | 0   | 0   | 0   | 0   | 0   | 0   |
| OTU369 | 1   | 0   | 1   | 0   | 19  | 0   | 0   | 0   | 0   | 0   | 0   | 3   | 0   | 0   | 0   |
| OTU368 | 9   | 2   | 2   | 5   | 7   | 7   | 1   | 0   | 0   | 5   | 0   | 9   | 1   | 2   | 0   |
| OTU303 | 2   | 0   | 9   | 3   | 0   | 0   | 3   | 0   | 0   | 1   | 7   | 9   | 5   | 4   | 20  |
| OTU130 | 142 | 105 | 22  | 63  | 5   | 81  | 81  | 142 | 9   | 119 | 50  | 15  | 100 | 63  | 33  |
| OTU131 | 28  | 32  | 12  | 166 | 52  | 97  | 142 | 222 | 41  | 120 | 46  | 99  | 138 | 13  | 150 |
| OTU132 | 72  | 133 | 1   | 1   | 17  | 4   | 2   | 2   | 8   | 6   | 7   | 33  | 5   | 19  | 32  |
| OTU133 | 5   | 211 | 134 | 28  | 100 | 1   | 24  | 31  | 62  | 42  | 58  | 54  | 97  | 8   | 27  |
| OTU134 | 8   | 3   | 0   | 1   | 0   | 0   | 0   | 0   | 177 | 1   | 5   | 0   | 5   | 313 | 2   |
| OTU135 | 87  | 29  | 58  | 29  | 117 | 70  | 34  | 11  | 23  | 40  | 48  | 38  | 38  | 22  | 80  |
| OTU136 | 10  | 68  | 93  | 157 | 38  | 35  | 64  | 125 | 71  | 30  | 35  | 168 | 169 | 376 | 188 |
| OTU137 | 0   | 0   | 181 | 0   | 10  | 0   | 0   | 0   | 0   | 0   | 0   | 19  | 0   | 0   | 0   |
| OTU138 | 61  | 87  | 1   | 9   | 15  | 6   | 42  | 95  | 77  | 157 | 44  | 4   | 170 | 39  | 132 |
| OTU139 | 71  | 6   | 47  | 51  | 127 | 1   | 4   | 19  | 55  | 0   | 3   | 147 | 2   | 1   | 0   |
| OTU189 | 1   | 0   | 0   | 7   | 0   | 75  | 3   | 1   | 1   | 2   | 25  | 13  | 0   | 0   | 0   |
| OTU188 | 32  | 82  | 4   | 4   | 8   | 0   | 21  | 5   | 0   | 38  | 0   | 1   | 44  | 4   | 1   |
| OTU185 | 11  | 8   | 0   | 3   | 0   | 296 | 9   | 2   | 16  | 62  | 0   | 4   | 1   | 0   | 2   |

|        |     |     |     |     |     |     |     |     |     |     |     |     |     |     |     |
|--------|-----|-----|-----|-----|-----|-----|-----|-----|-----|-----|-----|-----|-----|-----|-----|
| OTU184 | 49  | 19  | 118 | 19  | 111 | 43  | 8   | 5   | 4   | 28  | 51  | 19  | 1   | 1   | 4   |
| OTU187 | 95  | 0   | 125 | 0   | 131 | 0   | 0   | 1   | 0   | 0   | 0   | 165 | 0   | 0   | 0   |
| OTU186 | 12  | 0   | 75  | 0   | 63  | 0   | 0   | 0   | 0   | 0   | 0   | 52  | 0   | 0   | 0   |
| OTU181 | 79  | 16  | 15  | 0   | 53  | 0   | 0   | 0   | 3   | 1   | 0   | 10  | 0   | 1   | 0   |
| OTU180 | 20  | 69  | 9   | 39  | 196 | 3   | 2   | 125 | 49  | 16  | 1   | 13  | 31  | 103 | 2   |
| OTU183 | 48  | 32  | 22  | 13  | 25  | 26  | 10  | 6   | 76  | 76  | 12  | 6   | 12  | 45  | 23  |
| OTU182 | 34  | 7   | 162 | 37  | 217 | 44  | 21  | 11  | 13  | 29  | 18  | 53  | 18  | 16  | 21  |
| OTU493 | 2   | 1   | 0   | 1   | 1   | 14  | 2   | 1   | 4   | 7   | 1   | 2   | 0   | 0   | 1   |
| OTU492 | 3   | 0   | 2   | 11  | 0   | 11  | 3   | 1   | 3   | 5   | 12  | 0   | 6   | 0   | 3   |
| OTU98  | 60  | 8   | 212 | 434 | 190 | 85  | 561 | 35  | 2   | 177 | 5   | 119 | 5   | 1   | 2   |
| OTU99  | 36  | 113 | 0   | 38  | 4   | 41  | 150 | 132 | 221 | 109 | 6   | 31  | 63  | 40  | 109 |
| OTU94  | 50  | 0   | 219 | 0   | 141 | 0   | 0   | 0   | 0   | 0   | 0   | 103 | 0   | 1   | 0   |
| OTU95  | 86  | 79  | 37  | 98  | 133 | 22  | 122 | 308 | 98  | 153 | 14  | 130 | 153 | 247 | 178 |
| OTU96  | 272 | 0   | 105 | 0   | 127 | 0   | 0   | 0   | 0   | 0   | 0   | 71  | 0   | 0   | 0   |
| OTU97  | 18  | 43  | 218 | 1   | 23  | 16  | 21  | 7   | 344 | 15  | 15  | 1   | 39  | 26  | 5   |
| OTU90  | 140 | 157 | 133 | 7   | 62  | 41  | 16  | 8   | 303 | 9   | 9   | 37  | 18  | 36  | 1   |
| OTU91  | 247 | 35  | 7   | 25  | 2   | 131 | 34  | 40  | 126 | 93  | 36  | 5   | 60  | 65  | 151 |
| OTU92  | 34  | 1   | 4   | 11  | 2   | 28  | 1   | 0   | 1   | 0   | 410 | 27  | 0   | 1   | 3   |
| OTU93  | 2   | 129 | 0   | 6   | 7   | 1   | 62  | 1   | 2   | 1   | 121 | 7   | 0   | 287 | 8   |
| OTU318 | 1   | 0   | 13  | 0   | 3   | 0   | 0   | 0   | 0   | 0   | 0   | 0   | 0   | 0   | 0   |
| OTU319 | 15  | 8   | 0   | 29  | 0   | 7   | 1   | 0   | 0   | 2   | 5   | 1   | 13  | 0   | 2   |
| OTU310 | 12  | 0   | 13  | 0   | 26  | 0   | 0   | 0   | 0   | 0   | 0   | 21  | 0   | 0   | 0   |
| OTU311 | 1   | 5   | 0   | 22  | 0   | 1   | 0   | 5   | 2   | 1   | 3   | 2   | 2   | 1   | 2   |
| OTU312 | 2   | 6   | 2   | 2   | 2   | 12  | 7   | 2   | 0   | 12  | 0   | 3   | 20  | 5   | 10  |
| OTU313 | 10  | 15  | 12  | 4   | 5   | 47  | 14  | 5   | 5   | 39  | 8   | 5   | 5   | 9   | 7   |
| OTU314 | 33  | 0   | 25  | 2   | 0   | 14  | 7   | 6   | 2   | 4   | 43  | 0   | 0   | 0   | 0   |
| OTU315 | 0   | 0   | 0   | 0   | 0   | 34  | 7   | 0   | 0   | 20  | 0   | 2   | 0   | 2   | 0   |
| OTU316 | 9   | 2   | 2   | 6   | 0   | 4   | 4   | 1   | 17  | 2   | 4   | 2   | 4   | 5   | 1   |
| OTU317 | 1   | 22  | 0   | 9   | 0   | 0   | 9   | 8   | 14  | 3   | 1   | 5   | 16  | 7   | 6   |
| OTU417 | 1   | 1   | 3   | 4   | 6   | 0   | 2   | 7   | 3   | 2   | 0   | 4   | 0   | 0   | 0   |
| OTU416 | 0   | 1   | 0   | 6   | 0   | 0   | 1   | 0   | 0   | 0   | 0   | 4   | 1   | 0   | 1   |
| OTU415 | 0   | 13  | 0   | 0   | 0   | 0   | 4   | 0   | 0   | 0   | 0   | 0   | 9   | 3   | 3   |
| OTU414 | 0   | 6   | 0   | 0   | 0   | 2   | 1   | 1   | 7   | 0   | 0   | 0   | 0   | 0   | 0   |
| OTU413 | 4   | 0   | 2   | 6   | 0   | 4   | 2   | 10  | 0   | 2   | 0   | 1   | 5   | 5   | 1   |
| OTU412 | 9   | 0   | 10  | 0   | 7   | 0   | 0   | 0   | 0   | 0   | 0   | 3   | 0   | 0   | 0   |
| OTU411 | 1   | 4   | 2   | 2   | 0   | 0   | 2   | 0   | 3   | 2   | 4   | 3   | 4   | 10  | 1   |
| OTU410 | 3   | 0   | 0   | 2   | 0   | 0   | 1   | 0   | 0   | 3   | 0   | 1   | 16  | 0   | 9   |
| OTU419 | 9   | 6   | 171 | 92  | 1   | 21  | 77  | 4   | 192 | 50  | 1   | 29  | 57  | 24  | 170 |
| OTU370 | 0   | 0   | 11  | 0   | 3   | 0   | 0   | 0   | 0   | 0   | 0   | 1   | 0   | 0   | 0   |
| OTU309 | 2   | 0   | 13  | 0   | 6   | 0   | 0   | 0   | 0   | 0   | 0   | 0   | 0   | 0   | 0   |
| OTU263 | 5   | 0   | 23  | 0   | 10  | 0   | 0   | 0   | 0   | 0   | 0   | 1   | 0   | 0   | 0   |



|        |     |     |     |     |     |      |     |      |     |      |     |     |     |     |     |
|--------|-----|-----|-----|-----|-----|------|-----|------|-----|------|-----|-----|-----|-----|-----|
| OTU424 | 78  | 82  | 278 | 98  | 214 | 104  | 145 | 37   | 70  | 193  | 97  | 28  | 37  | 342 | 401 |
| OTU389 | 6   | 1   | 0   | 0   | 0   | 0    | 3   | 1    | 0   | 0    | 1   | 0   | 1   | 0   | 0   |
| OTU388 | 93  | 0   | 0   | 6   | 0   | 0    | 1   | 2    | 2   | 2    | 5   | 26  | 54  | 95  | 95  |
| OTU387 | 1   | 1   | 2   | 2   | 3   | 0    | 1   | 0    | 2   | 0    | 0   | 2   | 0   | 2   | 3   |
| OTU386 | 5   | 0   | 1   | 0   | 3   | 2    | 1   | 0    | 1   | 6    | 1   | 3   | 0   | 2   | 1   |
| OTU385 | 118 | 79  | 21  | 18  | 23  | 21   | 77  | 11   | 284 | 57   | 88  | 3   | 46  | 9   | 8   |
| OTU384 | 1   | 4   | 4   | 5   | 5   | 7    | 1   | 17   | 7   | 1    | 2   | 8   | 7   | 2   | 6   |
| OTU383 | 3   | 0   | 36  | 0   | 105 | 54   | 0   | 0    | 0   | 1    | 1   | 131 | 0   | 0   | 0   |
| OTU382 | 0   | 6   | 0   | 1   | 0   | 0    | 0   | 0    | 1   | 0    | 1   | 2   | 6   | 1   | 1   |
| OTU381 | 1   | 1   | 5   | 2   | 8   | 2    | 2   | 3    | 6   | 4    | 4   | 6   | 6   | 0   | 0   |
| OTU380 | 4   | 7   | 0   | 0   | 1   | 0    | 6   | 0    | 5   | 9    | 0   | 1   | 4   | 0   | 2   |
| OTU251 | 23  | 2   | 65  | 35  | 5   | 82   | 16  | 26   | 2   | 1    | 38  | 13  | 5   | 4   | 4   |
| OTU250 | 36  | 28  | 10  | 11  | 14  | 19   | 3   | 7    | 9   | 10   | 13  | 4   | 0   | 7   | 2   |
| OTU253 | 3   | 3   | 0   | 12  | 0   | 469  | 5   | 15   | 14  | 12   | 1   | 110 | 23  | 12  | 13  |
| OTU252 | 1   | 0   | 12  | 0   | 46  | 0    | 0   | 0    | 0   | 0    | 0   | 18  | 0   | 0   | 0   |
| OTU255 | 3   | 4   | 1   | 42  | 5   | 7    | 13  | 56   | 18  | 10   | 9   | 46  | 1   | 18  | 16  |
| OTU254 | 35  | 0   | 0   | 21  | 4   | 3    | 0   | 14   | 2   | 7    | 11  | 30  | 1   | 0   | 1   |
| OTU257 | 2   | 1   | 54  | 3   | 9   | 58   | 6   | 1    | 0   | 11   | 22  | 5   | 1   | 0   | 4   |
| OTU256 | 2   | 45  | 9   | 0   | 3   | 5    | 0   | 2    | 0   | 1    | 1   | 2   | 21  | 2   | 5   |
| OTU259 | 17  | 0   | 7   | 5   | 16  | 15   | 2   | 0    | 2   | 2    | 27  | 2   | 0   | 0   | 0   |
| OTU258 | 35  | 0   | 23  | 0   | 14  | 0    | 0   | 0    | 0   | 0    | 0   | 36  | 0   | 0   | 0   |
| OTU488 | 3   | 21  | 6   | 10  | 8   | 3    | 22  | 15   | 0   | 1    | 3   | 3   | 5   | 19  | 21  |
| OTU426 | 2   | 1   | 6   | 1   | 4   | 1    | 1   | 1    | 0   | 0    | 1   | 1   | 0   | 0   | 0   |
| OTU49  | 1   | 539 | 0   | 6   | 1   | 0    | 38  | 10   | 89  | 30   | 0   | 0   | 17  | 54  | 11  |
| OTU48  | 462 | 1   | 347 | 0   | 513 | 1    | 0   | 0    | 0   | 0    | 0   | 548 | 0   | 0   | 1   |
| OTU47  | 68  | 283 | 24  | 692 | 69  | 349  | 364 | 1144 | 104 | 293  | 595 | 653 | 387 | 118 | 482 |
| OTU46  | 415 | 39  | 121 | 555 | 76  | 17   | 10  | 143  | 569 | 127  | 74  | 26  | 19  | 132 | 12  |
| OTU45  | 518 | 6   | 167 | 402 | 350 | 0    | 146 | 143  | 502 | 79   | 85  | 177 | 329 | 296 | 136 |
| OTU44  | 0   | 6   | 0   | 6   | 1   | 11   | 514 | 6    | 6   | 1037 | 25  | 5   | 2   | 2   | 2   |
| OTU43  | 54  | 392 | 0   | 289 | 41  | 26   | 374 | 200  | 761 | 326  | 14  | 84  | 610 | 875 | 768 |
| OTU42  | 13  | 20  | 259 | 3   | 1   | 1215 | 0   | 13   | 161 | 1    | 24  | 4   | 0   | 1   | 0   |
| OTU41  | 7   | 14  | 4   | 0   | 1   | 0    | 0   | 0    | 744 | 5    | 0   | 1   | 23  | 157 | 5   |
| OTU40  | 27  | 0   | 0   | 41  | 1   | 1132 | 16  | 3    | 0   | 38   | 1   | 42  | 0   | 0   | 1   |
| OTU58  | 312 | 8   | 128 | 46  | 549 | 75   | 20  | 18   | 1   | 23   | 8   | 54  | 28  | 17  | 47  |
| OTU425 | 2   | 0   | 0   | 0   | 0   | 0    | 0   | 6    | 0   | 0    | 0   | 3   | 1   | 0   | 0   |
| OTU59  | 75  | 19  | 228 | 0   | 589 | 0    | 1   | 3    | 151 | 4    | 13  | 147 | 2   | 4   | 0   |
| OTU422 | 5   | 0   | 0   | 3   | 1   | 17   | 4   | 1    | 0   | 3    | 0   | 6   | 3   | 0   | 2   |
| OTU423 | 0   | 0   | 0   | 4   | 0   | 0    | 2   | 2    | 0   | 0    | 0   | 0   | 5   | 3   | 3   |
| OTU174 | 22  | 13  | 1   | 27  | 5   | 51   | 12  | 27   | 6   | 12   | 189 | 8   | 2   | 0   | 1   |
| OTU175 | 5   | 0   | 106 | 6   | 41  | 35   | 3   | 2    | 14  | 8    | 147 | 8   | 0   | 1   | 0   |
| OTU176 | 53  | 11  | 17  | 38  | 11  | 30   | 28  | 18   | 62  | 74   | 39  | 11  | 25  | 34  | 70  |

|        |     |     |     |     |     |     |     |    |     |     |    |    |     |     |     |
|--------|-----|-----|-----|-----|-----|-----|-----|----|-----|-----|----|----|-----|-----|-----|
| OTU177 | 37  | 7   | 54  | 26  | 45  | 102 | 8   | 3  | 6   | 44  | 43 | 13 | 7   | 1   | 4   |
| OTU170 | 46  | 19  | 62  | 34  | 40  | 29  | 28  | 1  | 24  | 27  | 31 | 14 | 12  | 91  | 20  |
| OTU171 | 127 | 66  | 94  | 89  | 92  | 203 | 58  | 17 | 96  | 84  | 44 | 25 | 64  | 102 | 60  |
| OTU172 | 18  | 7   | 6   | 41  | 7   | 1   | 15  | 21 | 14  | 2   | 24 | 51 | 83  | 6   | 28  |
| OTU173 | 2   | 23  | 85  | 7   | 114 | 22  | 6   | 7  | 6   | 12  | 5  | 20 | 13  | 21  | 3   |
| OTU420 | 0   | 1   | 0   | 5   | 0   | 0   | 0   | 0  | 7   | 0   | 0  | 0  | 0   | 2   | 0   |
| OTU178 | 13  | 33  | 12  | 59  | 28  | 13  | 58  | 25 | 24  | 41  | 18 | 52 | 92  | 42  | 71  |
| OTU179 | 27  | 1   | 0   | 9   | 0   | 47  | 16  | 6  | 31  | 91  | 11 | 1  | 15  | 86  | 28  |
| OTU427 | 0   | 0   | 0   | 0   | 6   | 0   | 0   | 0  | 0   | 0   | 0  | 1  | 0   | 0   | 0   |
| OTU421 | 0   | 2   | 1   | 0   | 0   | 0   | 2   | 1  | 2   | 2   | 0  | 4  | 7   | 1   | 1   |
| OTU418 | 9   | 0   | 1   | 3   | 6   | 2   | 1   | 7  | 12  | 6   | 1  | 0  | 0   | 9   | 3   |
| OTU56  | 112 | 534 | 227 | 142 | 178 | 106 | 74  | 36 | 106 | 144 | 90 | 60 | 66  | 249 | 128 |
| OTU57  | 35  | 582 | 31  | 42  | 12  | 47  | 117 | 22 | 20  | 118 | 35 | 9  | 175 | 87  | 39  |
| OTU459 | 0   | 0   | 0   | 2   | 0   | 0   | 1   | 0  | 2   | 0   | 0  | 0  | 0   | 0   | 0   |
| OTU458 | 0   | 2   | 0   | 1   | 0   | 0   | 0   | 0  | 4   | 0   | 0  | 0  | 0   | 2   | 0   |
| OTU453 | 3   | 1   | 0   | 1   | 1   | 0   | 1   | 0  | 2   | 2   | 0  | 1  | 1   | 9   | 3   |
| OTU452 | 3   | 2   | 0   | 1   | 1   | 1   | 0   | 3  | 4   | 1   | 2  | 1  | 1   | 0   | 3   |
| OTU451 | 0   | 1   | 6   | 0   | 1   | 0   | 1   | 1  | 3   | 1   | 0  | 0  | 0   | 2   | 1   |
| OTU450 | 0   | 0   | 0   | 0   | 0   | 1   | 1   | 0  | 1   | 0   | 0  | 0  | 0   | 0   | 0   |
| OTU457 | 1   | 2   | 7   | 4   | 15  | 15  | 0   | 73 | 21  | 2   | 0  | 2  | 0   | 0   | 0   |
| OTU456 | 0   | 0   | 6   | 4   | 7   | 1   | 4   | 2  | 0   | 0   | 2  | 5  | 1   | 0   | 0   |
| OTU455 | 0   | 0   | 3   | 1   | 1   | 2   | 2   | 2  | 6   | 2   | 1  | 3  | 2   | 4   | 3   |
| OTU454 | 0   | 0   | 7   | 0   | 4   | 0   | 0   | 0  | 0   | 0   | 0  | 0  | 0   | 0   | 0   |
| OTU228 | 8   | 2   | 4   | 9   | 9   | 24  | 8   | 2  | 18  | 29  | 57 | 9  | 8   | 46  | 10  |
| OTU229 | 0   | 32  | 0   | 39  | 1   | 8   | 31  | 28 | 14  | 12  | 6  | 56 | 9   | 10  | 3   |
| OTU220 | 0   | 0   | 0   | 0   | 0   | 1   | 0   | 0  | 0   | 0   | 59 | 0  | 0   | 0   | 0   |
| OTU221 | 0   | 0   | 0   | 0   | 0   | 0   | 4   | 68 | 1   | 24  | 0  | 0  | 0   | 0   | 0   |
| OTU222 | 5   | 17  | 0   | 0   | 2   | 0   | 19  | 57 | 21  | 27  | 15 | 1  | 30  | 73  | 52  |
| OTU223 | 7   | 0   | 34  | 0   | 42  | 0   | 0   | 0  | 0   | 0   | 0  | 4  | 0   | 0   | 0   |
| OTU224 | 0   | 0   | 53  | 0   | 60  | 0   | 0   | 0  | 0   | 0   | 0  | 33 | 0   | 0   | 0   |
| OTU225 | 34  | 0   | 103 | 0   | 59  | 0   | 0   | 0  | 0   | 0   | 0  | 47 | 0   | 0   | 0   |
| OTU226 | 7   | 0   | 53  | 0   | 42  | 0   | 1   | 0  | 0   | 0   | 0  | 23 | 0   | 0   | 0   |
| OTU227 | 20  | 7   | 4   | 4   | 5   | 0   | 3   | 9  | 59  | 4   | 0  | 7  | 37  | 62  | 36  |
| OTU358 | 28  | 4   | 51  | 17  | 36  | 18  | 14  | 1  | 13  | 24  | 16 | 16 | 18  | 15  | 7   |
| OTU359 | 1   | 3   | 6   | 2   | 0   | 1   | 3   | 0  | 1   | 3   | 1  | 3  | 2   | 3   | 0   |
| OTU428 | 0   | 0   | 1   | 0   | 2   | 0   | 0   | 0  | 2   | 0   | 0  | 0  | 0   | 0   | 1   |
| OTU429 | 0   | 7   | 0   | 0   | 0   | 0   | 0   | 0  | 0   | 0   | 0  | 0  | 0   | 0   | 0   |
| OTU354 | 31  | 5   | 15  | 32  | 7   | 66  | 14  | 4  | 2   | 15  | 57 | 7  | 4   | 6   | 6   |
| OTU355 | 5   | 1   | 17  | 4   | 10  | 10  | 2   | 2  | 1   | 4   | 1  | 1  | 2   | 5   | 2   |
| OTU356 | 0   | 0   | 0   | 4   | 0   | 0   | 2   | 0  | 2   | 1   | 8  | 8  | 1   | 13  | 11  |
| OTU357 | 5   | 2   | 17  | 0   | 10  | 1   | 3   | 3  | 10  | 6   | 26 | 9  | 0   | 1   | 4   |

|        |      |     |      |      |      |      |      |      |     |      |      |      |      |      |      |
|--------|------|-----|------|------|------|------|------|------|-----|------|------|------|------|------|------|
| OTU350 | 16   | 4   | 1    | 8    | 0    | 9    | 3    | 4    | 5   | 5    | 2    | 2    | 6    | 1    | 1    |
| OTU351 | 2    | 0   | 11   | 0    | 11   | 0    | 0    | 0    | 0   | 0    | 0    | 7    | 0    | 0    | 0    |
| OTU352 | 3    | 0   | 23   | 3    | 5    | 9    | 0    | 0    | 0   | 0    | 6    | 3    | 0    | 0    | 0    |
| OTU353 | 10   | 0   | 0    | 10   | 1    | 14   | 6    | 0    | 0   | 4    | 2    | 2    | 4    | 14   | 3    |
| OTU129 | 9    | 0   | 122  | 1    | 194  | 0    | 1    | 0    | 0   | 0    | 0    | 81   | 0    | 0    | 0    |
| OTU128 | 143  | 21  | 124  | 4    | 176  | 0    | 4    | 1    | 19  | 3    | 3    | 69   | 16   | 4    | 1    |
| OTU127 | 92   | 75  | 77   | 129  | 178  | 20   | 94   | 174  | 170 | 30   | 21   | 229  | 92   | 446  | 94   |
| OTU126 | 2    | 117 | 0    | 35   | 1    | 2    | 22   | 3    | 34  | 31   | 4    | 33   | 74   | 19   | 11   |
| OTU125 | 30   | 91  | 84   | 101  | 77   | 19   | 98   | 160  | 67  | 37   | 6    | 115  | 102  | 240  | 144  |
| OTU124 | 52   | 64  | 0    | 19   | 13   | 18   | 142  | 27   | 194 | 76   | 18   | 18   | 83   | 6    | 21   |
| OTU123 | 10   | 24  | 21   | 36   | 32   | 11   | 89   | 68   | 20  | 32   | 20   | 50   | 43   | 85   | 61   |
| OTU122 | 198  | 27  | 14   | 53   | 33   | 51   | 32   | 57   | 136 | 22   | 5    | 56   | 55   | 77   | 156  |
| OTU121 | 33   | 53  | 0    | 146  | 0    | 264  | 19   | 2    | 24  | 120  | 82   | 102  | 3    | 55   | 8    |
| OTU120 | 0    | 48  | 0    | 8    | 9    | 375  | 170  | 1    | 0   | 152  | 0    | 0    | 2    | 3    | 4    |
| OTU489 | 1    | 0   | 0    | 1    | 0    | 2    | 0    | 0    | 0   | 1    | 1    | 0    | 1    | 0    | 1    |
| OTU14  | 153  | 20  | 0    | 377  | 51   | 2281 | 336  | 79   | 83  | 425  | 1260 | 80   | 288  | 964  | 466  |
| OTU15  | 258  | 138 | 22   | 1514 | 183  | 1132 | 1106 | 2271 | 89  | 648  | 1058 | 773  | 844  | 71   | 1003 |
| OTU16  | 51   | 300 | 21   | 439  | 106  | 655  | 665  | 353  | 46  | 209  | 584  | 1443 | 1058 | 152  | 753  |
| OTU17  | 67   | 502 | 150  | 719  | 529  | 362  | 673  | 1317 | 399 | 337  | 493  | 1470 | 559  | 1635 | 606  |
| OTU10  | 1610 | 121 | 401  | 38   | 64   | 389  | 84   | 15   | 564 | 416  | 298  | 24   | 264  | 856  | 104  |
| OTU11  | 412  | 760 | 0    | 1678 | 2    | 328  | 1742 | 215  | 183 | 1322 | 204  | 72   | 8    | 2    | 3    |
| OTU12  | 175  | 0   | 1579 | 0    | 170  | 1    | 0    | 0    | 0   | 1    | 0    | 24   | 1    | 0    | 0    |
| OTU13  | 320  | 407 | 376  | 170  | 569  | 74   | 264  | 346  | 519 | 136  | 34   | 444  | 202  | 1268 | 257  |
| OTU18  | 75   | 289 | 21   | 854  | 80   | 220  | 569  | 1754 | 650 | 329  | 158  | 501  | 454  | 589  | 813  |
| OTU19  | 92   | 149 | 168  | 217  | 433  | 104  | 272  | 493  | 267 | 116  | 163  | 1047 | 308  | 359  | 258  |
| OTU462 | 6    | 0   | 23   | 8    | 1    | 16   | 5    | 0    | 27  | 7    | 0    | 4    | 2    | 5    | 5    |
| OTU463 | 9    | 6   | 0    | 11   | 0    | 0    | 25   | 25   | 0   | 54   | 151  | 0    | 0    | 3    | 0    |
| OTU460 | 3    | 4   | 0    | 0    | 0    | 3    | 1    | 6    | 1   | 0    | 0    | 5    | 0    | 5    | 1    |
| OTU461 | 2    | 1   | 8    | 1    | 0    | 1    | 2    | 2    | 0   | 0    | 1    | 2    | 6    | 1    | 1    |
| OTU466 | 0    | 2   | 0    | 0    | 0    | 0    | 1    | 3    | 0   | 1    | 2    | 0    | 0    | 0    | 1    |
| OTU467 | 1    | 2   | 1    | 2    | 0    | 0    | 2    | 0    | 0   | 0    | 1    | 1    | 1    | 0    | 0    |
| OTU464 | 2    | 1   | 1    | 1    | 3    | 0    | 1    | 0    | 0   | 0    | 0    | 1    | 1    | 0    | 6    |
| OTU465 | 0    | 0   | 0    | 2    | 0    | 0    | 2    | 0    | 0   | 3    | 7    | 0    | 0    | 0    | 0    |
| OTU468 | 0    | 0   | 0    | 0    | 0    | 0    | 0    | 0    | 0   | 0    | 0    | 2    | 0    | 0    | 0    |
| OTU469 | 0    | 3   | 0    | 0    | 0    | 0    | 0    | 0    | 0   | 1    | 0    | 0    | 0    | 1    | 0    |
| OTU497 | 0    | 1   | 0    | 0    | 2    | 0    | 0    | 2    | 2   | 0    | 0    | 0    | 0    | 2    | 0    |
| OTU269 | 175  | 678 | 202  | 97   | 258  | 46   | 237  | 99   | 219 | 59   | 5    | 191  | 105  | 261  | 102  |
| OTU495 | 0    | 0   | 0    | 2    | 0    | 1    | 0    | 6    | 1   | 0    | 1    | 2    | 2    | 0    | 4    |
| OTU494 | 13   | 25  | 0    | 9    | 4    | 6    | 15   | 1    | 11  | 25   | 3    | 2    | 23   | 5    | 2    |
| OTU8   | 0    | 48  | 2    | 914  | 1    | 815  | 217  | 544  | 61  | 114  | 490  | 253  | 1680 | 4    | 1591 |
| OTU9   | 160  | 37  | 2072 | 32   | 2042 | 118  | 12   | 14   | 8   | 45   | 40   | 159  | 7    | 10   | 5    |

|        |      |      |     |      |     |     |      |      |      |     |      |      |      |      |      |
|--------|------|------|-----|------|-----|-----|------|------|------|-----|------|------|------|------|------|
| OTU6   | 1512 | 1795 | 344 | 285  | 312 | 136 | 214  | 230  | 4    | 288 | 36   | 315  | 486  | 10   | 324  |
| OTU7   | 120  | 964  | 37  | 1531 | 129 | 216 | 1558 | 1398 | 172  | 851 | 276  | 959  | 1149 | 117  | 872  |
| OTU4   | 198  | 645  | 40  | 969  | 221 | 220 | 1056 | 1709 | 920  | 821 | 459  | 436  | 1348 | 241  | 2132 |
| OTU5   | 329  | 576  | 23  | 528  | 64  | 508 | 754  | 467  | 1049 | 720 | 540  | 288  | 1173 | 1511 | 813  |
| OTU2   | 958  | 553  | 928 | 464  | 976 | 361 | 1100 | 507  | 321  | 821 | 563  | 1496 | 2421 | 268  | 1082 |
| OTU3   | 1503 | 3725 | 492 | 681  | 62  | 284 | 689  | 147  | 409  | 963 | 1033 | 165  | 632  | 208  | 873  |
| OTU1   | 292  | 2    | 0   | 1    | 0   | 2   | 0    | 2    | 1    | 2   | 7140 | 8    | 1    | 0    | 1    |
| OTU491 | 53   | 0    | 25  | 0    | 121 | 1   | 0    | 0    | 1    | 0   | 21   | 9    | 0    | 3    | 1    |
| OTU490 | 0    | 0    | 0   | 0    | 0   | 0   | 0    | 0    | 2    | 0   | 0    | 0    | 0    | 0    | 1    |
| OTU307 | 28   | 0    | 21  | 0    | 38  | 0   | 0    | 0    | 0    | 0   | 0    | 38   | 0    | 0    | 0    |
| OTU306 | 7    | 5    | 7   | 13   | 7   | 7   | 6    | 7    | 11   | 6   | 5    | 15   | 10   | 1    | 6    |
| OTU305 | 1    | 1    | 4   | 4    | 9   | 0   | 0    | 0    | 1    | 3   | 0    | 3    | 0    | 2    | 7    |
| OTU304 | 4    | 0    | 0   | 32   | 1   | 7   | 0    | 2    | 3    | 8   | 0    | 0    | 0    | 1    | 0    |
| OTU268 | 7    | 27   | 1   | 14   | 3   | 2   | 8    | 4    | 45   | 11  | 2    | 2    | 5    | 17   | 8    |
| OTU302 | 10   | 12   | 17  | 6    | 4   | 9   | 4    | 7    | 12   | 10  | 8    | 7    | 11   | 13   | 10   |
| OTU301 | 246  | 9    | 1   | 89   | 2   | 199 | 260  | 189  | 118  | 362 | 13   | 183  | 9    | 781  | 45   |
| OTU300 | 0    | 10   | 0   | 1    | 0   | 2   | 2    | 0    | 0    | 0   | 1    | 3    | 3    | 3    | 0    |
| OTU264 | 6    | 11   | 0   | 4    | 0   | 6   | 11   | 14   | 9    | 12  | 3    | 13   | 23   | 4    | 13   |
| OTU265 | 31   | 3    | 17  | 11   | 31  | 17  | 5    | 5    | 8    | 37  | 19   | 4    | 6    | 20   | 21   |
| OTU266 | 0    | 0    | 0   | 5    | 0   | 29  | 2    | 0    | 0    | 19  | 3    | 19   | 3    | 3    | 2    |
| OTU267 | 11   | 0    | 21  | 0    | 24  | 0   | 0    | 0    | 0    | 0   | 0    | 1    | 0    | 0    | 0    |
| OTU260 | 2    | 4    | 15  | 4    | 17  | 7   | 8    | 2    | 10   | 7   | 5    | 4    | 9    | 10   | 5    |
| OTU261 | 1    | 46   | 21  | 1    | 12  | 32  | 0    | 2    | 0    | 2   | 7    | 2    | 0    | 1    | 2    |
| OTU262 | 20   | 5    | 38  | 18   | 22  | 82  | 21   | 0    | 30   | 38  | 13   | 9    | 7    | 19   | 7    |
| OTU308 | 5    | 0    | 20  | 2    | 21  | 1   | 2    | 8    | 0    | 0   | 0    | 21   | 0    | 0    | 1    |
| OTU116 | 0    | 0    | 0   | 2    | 0   | 346 | 9    | 1    | 2    | 0   | 0    | 0    | 0    | 1    | 1    |
| OTU117 | 131  | 14   | 266 | 81   | 137 | 207 | 103  | 11   | 70   | 135 | 111  | 24   | 69   | 24   | 54   |
| OTU114 | 3    | 197  | 0   | 49   | 9   | 6   | 30   | 44   | 9    | 31  | 10   | 15   | 3    | 7    | 7    |
| OTU115 | 10   | 33   | 40  | 89   | 27  | 15  | 69   | 67   | 8    | 24  | 16   | 60   | 56   | 75   | 76   |
| OTU112 | 55   | 68   | 187 | 49   | 85  | 156 | 40   | 42   | 67   | 75  | 246  | 29   | 17   | 34   | 26   |
| OTU113 | 50   | 10   | 134 | 24   | 228 | 50  | 20   | 4    | 1    | 37  | 0    | 21   | 3    | 0    | 2    |
| OTU110 | 193  | 89   | 64  | 63   | 87  | 122 | 70   | 27   | 177  | 141 | 84   | 56   | 110  | 110  | 293  |
| OTU111 | 68   | 51   | 1   | 390  | 17  | 47  | 340  | 370  | 13   | 162 | 27   | 98   | 87   | 35   | 92   |
| OTU118 | 20   | 41   | 0   | 2    | 31  | 7   | 81   | 138  | 34   | 41  | 3    | 4    | 32   | 389  | 41   |
| OTU119 | 20   | 0    | 31  | 92   | 1   | 55  | 117  | 12   | 6    | 222 | 4    | 3    | 2    | 7    | 5    |
| OTU286 | 2    | 0    | 0   | 0    | 0   | 30  | 6    | 0    | 4    | 12  | 6    | 7    | 29   | 0    | 14   |
| OTU287 | 11   | 19   | 13  | 4    | 10  | 9   | 9    | 4    | 23   | 12  | 5    | 2    | 4    | 9    | 15   |
| OTU284 | 43   | 23   | 47  | 27   | 9   | 28  | 7    | 1    | 11   | 10  | 41   | 10   | 14   | 39   | 25   |
| OTU285 | 7    | 0    | 18  | 0    | 13  | 0   | 0    | 0    | 0    | 0   | 0    | 20   | 0    | 0    | 0    |
| OTU282 | 62   | 0    | 52  | 0    | 63  | 0   | 0    | 0    | 0    | 0   | 0    | 69   | 0    | 0    | 0    |
| OTU283 | 0    | 0    | 5   | 1    | 4   | 32  | 0    | 4    | 0    | 0   | 0    | 0    | 0    | 0    | 0    |

|        |      |      |      |     |      |      |      |      |      |      |     |     |      |      |      |
|--------|------|------|------|-----|------|------|------|------|------|------|-----|-----|------|------|------|
| OTU280 | 11   | 1    | 1    | 14  | 7    | 2    | 22   | 3    | 1    | 3    | 0   | 4   | 1    | 0    | 2    |
| OTU281 | 4    | 144  | 0    | 8   | 3    | 9    | 6    | 49   | 71   | 11   | 2   | 6   | 2    | 2    | 4    |
| OTU50  | 0    | 0    | 295  | 0   | 472  | 1    | 0    | 0    | 0    | 0    | 0   | 123 | 0    | 0    | 0    |
| OTU51  | 364  | 2    | 345  | 0   | 779  | 0    | 1    | 0    | 0    | 0    | 1   | 639 | 0    | 0    | 3    |
| OTU52  | 0    | 50   | 1    | 55  | 2    | 1    | 40   | 28   | 578  | 10   | 1   | 5   | 29   | 65   | 2    |
| OTU53  | 129  | 130  | 91   | 167 | 172  | 33   | 222  | 346  | 403  | 63   | 84  | 310 | 164  | 139  | 283  |
| OTU54  | 259  | 11   | 9    | 174 | 27   | 866  | 227  | 243  | 9    | 204  | 103 | 234 | 753  | 4    | 823  |
| OTU55  | 194  | 0    | 559  | 1   | 293  | 0    | 0    | 0    | 0    | 0    | 0   | 36  | 0    | 0    | 0    |
| OTU288 | 14   | 15   | 13   | 30  | 13   | 15   | 22   | 30   | 13   | 9    | 9   | 17  | 19   | 28   | 29   |
| OTU289 | 65   | 0    | 32   | 3   | 43   | 56   | 0    | 1    | 1    | 1    | 5   | 14  | 0    | 0    | 0    |
| OTU163 | 5    | 30   | 20   | 64  | 21   | 24   | 55   | 75   | 15   | 20   | 19  | 66  | 87   | 69   | 104  |
| OTU162 | 4    | 135  | 0    | 57  | 0    | 189  | 98   | 3    | 1    | 83   | 1   | 54  | 3    | 0    | 2    |
| OTU161 | 119  | 63   | 154  | 17  | 84   | 55   | 28   | 21   | 98   | 36   | 18  | 17  | 18   | 5    | 26   |
| OTU160 | 22   | 84   | 10   | 87  | 4    | 1    | 41   | 82   | 16   | 34   | 1   | 22  | 38   | 5    | 5    |
| OTU167 | 23   | 126  | 0    | 1   | 1    | 0    | 8    | 5    | 0    | 6    | 0   | 0   | 5    | 0    | 0    |
| OTU166 | 156  | 0    | 124  | 0   | 237  | 0    | 1    | 0    | 0    | 0    | 0   | 182 | 0    | 2    | 0    |
| OTU165 | 88   | 53   | 34   | 53  | 49   | 61   | 40   | 5    | 86   | 90   | 78  | 28  | 28   | 34   | 29   |
| OTU164 | 128  | 16   | 22   | 27  | 46   | 158  | 19   | 16   | 38   | 54   | 54  | 51  | 9    | 47   | 15   |
| OTU169 | 9    | 68   | 29   | 1   | 131  | 0    | 15   | 0    | 0    | 18   | 0   | 141 | 1    | 0    | 0    |
| OTU168 | 34   | 1    | 166  | 45  | 93   | 270  | 30   | 11   | 1    | 65   | 174 | 81  | 1    | 1    | 0    |
| OTU29  | 155  | 0    | 1008 | 0   | 1091 | 0    | 0    | 0    | 0    | 0    | 1   | 585 | 0    | 0    | 1    |
| OTU28  | 677  | 241  | 2    | 187 | 17   | 1301 | 361  | 49   | 579  | 1057 | 23  | 556 | 330  | 2    | 756  |
| OTU25  | 116  | 1746 | 0    | 235 | 15   | 9    | 432  | 565  | 346  | 154  | 2   | 127 | 188  | 330  | 89   |
| OTU24  | 301  | 184  | 544  | 504 | 553  | 422  | 596  | 1013 | 1    | 558  | 556 | 555 | 100  | 5    | 44   |
| OTU27  | 24   | 179  | 13   | 21  | 15   | 23   | 64   | 47   | 889  | 50   | 41  | 6   | 69   | 726  | 67   |
| OTU26  | 77   | 439  | 747  | 764 | 1322 | 884  | 374  | 527  | 429  | 116  | 667 | 937 | 587  | 1134 | 575  |
| OTU21  | 120  | 250  | 59   | 589 | 57   | 234  | 550  | 1230 | 565  | 324  | 171 | 220 | 698  | 517  | 1001 |
| OTU20  | 350  | 81   | 301  | 73  | 277  | 160  | 67   | 18   | 17   | 124  | 22  | 29  | 543  | 124  | 979  |
| OTU23  | 1261 | 7    | 0    | 409 | 10   | 766  | 1121 | 158  | 1749 | 2523 | 870 | 406 | 1090 | 987  | 731  |
| OTU22  | 569  | 4    | 524  | 42  | 960  | 127  | 32   | 3    | 1    | 52   | 68  | 120 | 230  | 135  | 100  |

**Table S2: OTU network analyses showed 156 core microbiomes in all fecal samples.**

| OTU ID | Taxonomy | name                                          |
|--------|----------|-----------------------------------------------|
| OTU507 | genus    | <i>Clostridium XIva</i>                       |
| OTU338 | phylum   | <i>Firmicutes</i>                             |
| OTU337 | order    | <i>Clostridiales</i>                          |
| OTU349 | family   | <i>Lachnospiraceae</i>                        |
| OTU342 | order    | <i>Clostridiales</i>                          |
| OTU345 | family   | <i>Lachnospiraceae</i>                        |
| OTU159 | family   | <i>Lachnospiraceae</i>                        |
| OTU150 | order    | <i>Clostridiales</i>                          |
| OTU239 | genus    | <i>Oscillibacter</i>                          |
| OTU238 | genus    | <i>Flavonifractor</i>                         |
| OTU61  | genus    | <i>Parasutterella</i>                         |
| OTU65  | family   | <i>Ruminococcaceae</i>                        |
| OTU67  | genus    | <i>Oscillibacter</i>                          |
| OTU66  | genus    | <i>Bacteroides</i>                            |
| OTU68  | order    | <i>Clostridiales</i>                          |
| OTU208 | genus    | <i>Anaerotruncus</i>                          |
| OTU206 | genus    | <i>Saccharibacteria_genera_incertae_sedis</i> |
| OTU204 | order    | <i>Clostridiales</i>                          |
| OTU273 | family   | <i>Ruminococcaceae</i>                        |
| OTU272 | family   | <i>Ruminococcaceae</i>                        |
| OTU105 | genus    | <i>Oscillibacter</i>                          |
| OTU104 | family   | <i>Porphyromonadaceae</i>                     |
| OTU106 | family   | <i>Porphyromonadaceae</i>                     |
| OTU108 | family   | <i>Lachnospiraceae</i>                        |
| OTU291 | order    | <i>Clostridiales</i>                          |
| OTU290 | family   | <i>Lachnospiraceae</i>                        |
| OTU299 | family   | <i>Ruminococcaceae</i>                        |
| OTU298 | family   | <i>Lachnospiraceae</i>                        |
| OTU198 | genus    | <i>Lactobacillus</i>                          |
| OTU192 | family   | <i>Ruminococcaceae</i>                        |
| OTU39  | genus    | <i>Parabacteroides</i>                        |
| OTU36  | family   | <i>Porphyromonadaceae</i>                     |
| OTU34  | class    | <i>Deltaproteobacteria</i>                    |
| OTU35  | genus    | <i>Clostridium XIvb</i>                       |
| OTU33  | order    | <i>Clostridiales</i>                          |
| OTU30  | genus    | <i>Alistipes</i>                              |
| OTU31  | genus    | <i>Alloprevotella</i>                         |
| OTU83  | genus    | <i>Alistipes</i>                              |

|        |        |                            |
|--------|--------|----------------------------|
| OTU82  | family | <i>Ruminococcaceae</i>     |
| OTU81  | family | <i>Lachnospiraceae</i>     |
| OTU80  | genus  | <i>Lactobacillus</i>       |
| OTU87  | family | <i>Lachnospiraceae</i>     |
| OTU84  | family | <i>Lachnospiraceae</i>     |
| OTU89  | order  | <i>Clostridiales</i>       |
| OTU328 | order  | <i>Clostridiales</i>       |
| OTU407 | family | <i>Lachnospiraceae</i>     |
| OTU148 | family | <i>Lachnospiraceae</i>     |
| OTU140 | genus  | <i>Akkermansia</i>         |
| OTU143 | order  | <i>Clostridiales</i>       |
| OTU144 | family | <i>Porphyromonadaceae</i>  |
| OTU146 | phylum | <i>Firmicutes</i>          |
| OTU437 | family | <i>Lachnospiraceae</i>     |
| OTU436 | family | <i>Lachnospiraceae</i>     |
| OTU242 | genus  | <i>Oscillibacter</i>       |
| OTU246 | order  | <i>Clostridiales</i>       |
| OTU247 | family | <i>Lachnospiraceae</i>     |
| OTU72  | genus  | <i>Parabacteroides</i>     |
| OTU73  | order  | <i>Clostridiales</i>       |
| OTU70  | family | <i>Lachnospiraceae</i>     |
| OTU71  | family | <i>Ruminococcaceae</i>     |
| OTU77  | class  | <i>Clostridia</i>          |
| OTU74  | family | <i>Desulfovibrionaceae</i> |
| OTU75  | family | <i>Lachnospiraceae</i>     |
| OTU448 | family | <i>Lachnospiraceae</i>     |
| OTU215 | genus  | <i>Parabacteroides</i>     |
| OTU217 | genus  | <i>Butyricimonas</i>       |
| OTU216 | order  | <i>Clostridiales</i>       |
| OTU210 | family | <i>Lachnospiraceae</i>     |
| OTU213 | family | <i>Lachnospiraceae</i>     |
| OTU364 | family | <i>Lachnospiraceae</i>     |
| OTU130 | order  | <i>Clostridiales</i>       |
| OTU131 | genus  | <i>Barnesiella</i>         |
| OTU132 | family | <i>Lachnospiraceae</i>     |
| OTU133 | phylum | <i>Firmicutes</i>          |
| OTU135 | genus  | <i>Intestinimonas</i>      |
| OTU136 | genus  | <i>Barnesiella</i>         |
| OTU138 | genus  | <i>Turicibacter</i>        |
| OTU184 | family | <i>Lachnospiraceae</i>     |
| OTU180 | family | <i>Lachnospiraceae</i>     |

|        |         |                                    |
|--------|---------|------------------------------------|
| OTU183 | family  | <i>Ruminococcaceae</i>             |
| OTU182 | family  | <i>Lachnospiraceae</i>             |
| OTU98  | genus   | <i>Alistipes</i>                   |
| OTU95  | family  | <i>Porphyromonadaceae</i>          |
| OTU97  | order   | <i>Clostridiales</i>               |
| OTU90  | kingdom | <i>Bacteria</i>                    |
| OTU91  | genus   | <i>Anaerotruncus</i>               |
| OTU313 | genus   | <i>Acetatifactor</i>               |
| OTU419 | genus   | <i>Clostridium XI<sub>Va</sub></i> |
| OTU424 | family  | <i>Ruminococcaceae</i>             |
| OTU385 | order   | <i>Clostridiales</i>               |
| OTU384 | genus   | <i>Parasutterella</i>              |
| OTU251 | genus   | <i>Clostridium XI<sub>Va</sub></i> |
| OTU255 | order   | <i>Clostridiales</i>               |
| OTU47  | family  | <i>Porphyromonadaceae</i>          |
| OTU46  | family  | <i>Lachnospiraceae</i>             |
| OTU58  | genus   | <i>Roseburia</i>                   |
| OTU176 | genus   | <i>Clostridium XI<sub>Vb</sub></i> |
| OTU177 | family  | <i>Lachnospiraceae</i>             |
| OTU170 | genus   | <i>Clostridium IV</i>              |
| OTU171 | family  | <i>Lachnospiraceae</i>             |
| OTU172 | kingdom | <i>Bacteria</i>                    |
| OTU173 | order   | <i>Clostridiales</i>               |
| OTU178 | family  | <i>Porphyromonadaceae</i>          |
| OTU56  | genus   | <i>Flavonifractor</i>              |
| OTU57  | order   | <i>Clostridiales</i>               |
| OTU228 | family  | <i>Lachnospiraceae</i>             |
| OTU358 | family  | <i>Lachnospiraceae</i>             |
| OTU354 | genus   | <i>Clostridium IV</i>              |
| OTU355 | genus   | <i>Intestinimonas</i>              |
| OTU127 | genus   | <i>Bacteroides</i>                 |
| OTU125 | family  | <i>Porphyromonadaceae</i>          |
| OTU123 | family  | <i>Porphyromonadaceae</i>          |
| OTU122 | genus   | <i>Prevotella</i>                  |
| OTU15  | family  | <i>Porphyromonadaceae</i>          |
| OTU16  | genus   | <i>Barnesiella</i>                 |
| OTU17  | family  | <i>Porphyromonadaceae</i>          |
| OTU10  | genus   | <i>Mucispirillum</i>               |
| OTU13  | genus   | <i>Prevotella</i>                  |
| OTU18  | family  | <i>Porphyromonadaceae</i>          |
| OTU19  | genus   | <i>Bacteroides</i>                 |



|        |        |                                    |
|--------|--------|------------------------------------|
| OTU269 | genus  | <i>Alistipes</i>                   |
| OTU9   | family | <i>Lachnospiraceae</i>             |
| OTU6   | genus  | <i>Alistipes</i>                   |
| OTU7   | family | <i>Porphyromonadaceae</i>          |
| OTU4   | family | <i>Porphyromonadaceae</i>          |
| OTU5   | genus  | <i>Odoribacter</i>                 |
| OTU2   | order  | <i>Bacteroidales</i>               |
| OTU3   | family | <i>Lachnospiraceae</i>             |
| OTU306 | order  | <i>Clostridiales</i>               |
| OTU268 | genus  | <i>Anaerovorax</i>                 |
| OTU302 | genus  | <i>Arthrobacter</i>                |
| OTU301 | genus  | <i>Clostridium XI<sub>Va</sub></i> |
| OTU265 | genus  | <i>Oscillibacter</i>               |
| OTU260 | family | <i>Ruminococcaceae</i>             |
| OTU117 | genus  | <i>Butyricicoccus</i>              |
| OTU115 | order  | <i>Bacteroidales</i>               |
| OTU112 | family | <i>Lachnospiraceae</i>             |
| OTU110 | family | <i>Ruminococcaceae</i>             |
| OTU111 | family | <i>Porphyromonadaceae</i>          |
| OTU287 | family | <i>Ruminococcaceae</i>             |
| OTU284 | family | <i>Ruminococcaceae</i>             |
| OTU53  | family | <i>Porphyromonadaceae</i>          |
| OTU54  | family | <i>Lachnospiraceae</i>             |
| OTU288 | family | <i>Porphyromonadaceae</i>          |
| OTU163 | family | <i>Porphyromonadaceae</i>          |
| OTU161 | family | <i>Lachnospiraceae</i>             |
| OTU160 | family | <i>Rhodospirillaceae</i>           |
| OTU165 | family | <i>Ruminococcaceae</i>             |
| OTU164 | family | <i>Lachnospiraceae</i>             |
| OTU28  | genus  | <i>Acetatifactor</i>               |
| OTU24  | genus  | <i>Alistipes</i>                   |
| OTU27  | family | <i>Ruminococcaceae</i>             |
| OTU26  | family | <i>Porphyromonadaceae</i>          |
| OTU21  | family | <i>Porphyromonadaceae</i>          |
| OTU20  | family | <i>Lachnospiraceae</i>             |
| OTU22  | genus  | <i>Clostridium IV</i>              |

**Table S3: LEfSe analysis showed 143 specific OTUs which had a significant difference between groups.**

|        | normal_1    | normal_2    | normal_3    | normal_4    | normal_5    | betaine_1   | betaine_2   | betaine_3   | betaine_4   | betaine_5   | model_1     | model_2     | model_3     | model_4     | model_5     |
|--------|-------------|-------------|-------------|-------------|-------------|-------------|-------------|-------------|-------------|-------------|-------------|-------------|-------------|-------------|-------------|
| OTU5   | 0.000754024 | 0.009441694 | 0.01530997  | 0.010785824 | 0.002098154 | 0.049536111 | 0.026653116 | 0.038455234 | 0.03439006  | 0.018883389 | 0.0166541   | 0.017703177 | 0.023604236 | 0.017309773 | 0.02471888  |
| OTU11  | 0           | 0.002360424 | 0.007048487 | 0.013506868 | 6.56E-05    | 6.56E-05    | 9.84E-05    | 0.000262269 | 0.00599941  | 0.024915582 | 0.010753041 | 0.006687867 | 0.043339999 | 0.055010983 | 0.057109137 |
| OTU14  | 0           | 0.002622693 | 0.002589909 | 0.0050159   | 0.001671967 | 0.031603449 | 0.015277186 | 0.009441694 | 0.002721044 | 0.000655673 | 0.07477953  | 0.041307412 | 0.013933056 | 0.01235944  | 0.01101531  |
| OTU39  | 0.01039242  | 0.019932466 | 0.012752844 | 0.009212209 | 0.025145068 | 0.0367177   | 0.006294463 | 0.007507458 | 0.054420877 | 0.01137593  | 0.000655673 | 0.001540832 | 0.003147231 | 0.002786611 | 0.002753827 |
| OTU24  | 0.017834311 | 0.018194932 | 0.033209848 | 0.009867882 | 0.018129364 | 0.000163918 | 0.001442481 | 0.003278366 | 3.28E-05    | 0.006032194 | 0.013834705 | 0.018227715 | 0.018293283 | 0.016522965 | 0.019539062 |
| OTU38  | 0.001803101 | 0.05140478  | 0.016326263 | 6.56E-05    | 0.000196702 | 0           | 0.000163918 | 0           | 3.28E-05    | 0.000229486 | 0.004688063 | 9.84E-05    | 0.038258532 | 0.031210045 | 0.036324296 |
| OTU13  | 0.012326656 | 0.014555945 | 0.011343147 | 0.010490771 | 0.018653903 | 0.041569682 | 0.008425401 | 0.006622299 | 0.01701472  | 0.01334295  | 0.002425991 | 0.001114644 | 0.004458578 | 0.005573222 | 0.008654886 |
| OTU43  | 0           | 0.002753827 | 0.006556732 | 0.001770318 | 0.00134413  | 0.028685703 | 0.025177851 | 0.019998033 | 0.024948366 | 0.012851195 | 0.000852375 | 0.000458971 | 0.010687473 | 0.009474478 | 0.012261089 |
| OTU9   | 0.067927745 | 0.005212602 | 0.000458971 | 0.005245386 | 0.066944235 | 0.000327837 | 0.000163918 | 0.000229486 | 0.000262269 | 0.001212995 | 0.003868472 | 0.001311346 | 0.001475265 | 0.001049077 | 0.000393404 |
| OTU32  | 0           | 0.00403239  | 0.016686883 | 0.001540832 | 0.001475265 | 0.017670393 | 0.024259909 | 0.016785234 | 0.011572632 | 0.01235944  | 0.000393404 | 0.001049077 | 0.005966626 | 0.012261089 | 0.014523162 |
| OTU30  | 0.031210045 | 0.0166541   | 0.003245582 | 0.014949349 | 0.019244009 | 0.014818215 | 0.001311346 | 0.002524342 | 0.000688457 | 0.000163918 | 0.002819395 | 0.002393207 | 0.000426188 | 0.017145855 | 0.001311346 |
| OTU29  | 0.03304593  | 0.019178441 | 0           | 0.005081467 | 0.035766974 | 0           | 3.28E-05    | 0           | 0           | 0           | 0           | 3.28E-05    | 0           | 0           | 0           |
| OTU27  | 0.000426188 | 0.000196702 | 0.001540832 | 0.000786808 | 0.000491755 | 0.023800938 | 0.002196505 | 0.002262073 | 0.029144674 | 0.005868275 | 0.000754024 | 0.00134413  | 0.001639183 | 0.000688457 | 0.002098154 |
| OTU82  | 0.001442481 | 0.002524342 | 0.004097958 | 0.002589909 | 0.002163722 | 0.02068649  | 0.004196309 | 0.003475068 | 0.012654493 | 0.003835688 | 0.002393207 | 0.002491558 | 0.002196505 | 0.002262073 | 0.001770318 |
| OTU12  | 0.0517654   | 0.000786808 | 0           | 0.005737141 | 0.005573222 | 0           | 0           | 3.28E-05    | 0           | 0           | 3.28E-05    | 0           | 3.28E-05    | 0           | 0           |
| OTU98  | 0.006950136 | 0.003901256 | 0.001147428 | 0.00196702  | 0.006228896 | 3.28E-05    | 6.56E-05    | 0.000163918 | 6.56E-05    | 0.000262269 | 0.002786611 | 0.000163918 | 0.005802708 | 0.014228109 | 0.018391634 |
| OTU48  | 0.01137593  | 0.017965446 | 0           | 0.015146051 | 0.016818018 | 0           | 3.28E-05    | 0           | 0           | 3.28E-05    | 3.28E-05    | 0           | 0           | 0           | 0           |
| OTU78  | 0           | 0.001147428 | 0.000131135 | 0.001934236 | 0.000229486 | 0           | 0           | 0           | 0           | 3.28E-05    | 0.008818805 | 0.024391044 | 0.001311346 | 0.012523358 | 0.003147231 |
| OTU44  | 0           | 0.000163918 | 0.000196702 | 0           | 3.28E-05    | 6.56E-05    | 6.56E-05    | 6.56E-05    | 0.000196702 | 0.000196702 | 0.00036062  | 0.000819592 | 0.033996656 | 0.000196702 | 0.016850802 |
| OTU57  | 0.001016293 | 0.000295053 | 0.000721241 | 0.001147428 | 0.000393404 | 0.002852178 | 0.001278563 | 0.005737141 | 0.000655673 | 0.01908009  | 0.001540832 | 0.001147428 | 0.003868472 | 0.001376914 | 0.003835688 |
| OTU88  | 0           | 0.000163918 | 0.00062289  | 0.000262269 | 0.000229486 | 0.006491165 | 0.014785431 | 0.007474675 | 0.006327247 | 0.004360227 | 0           | 3.28E-05    | 0.001475265 | 0.000393404 | 0.001212995 |
| OTU40  | 0           | 0.001376914 | 9.84E-05    | 0.000885159 | 3.28E-05    | 0           | 3.28E-05    | 0           | 0           | 0           | 0.037111104 | 3.28E-05    | 0.001245779 | 0.00134413  | 0.000524539 |
| OTU83  | 0.000163918 | 0.001835885 | 0.002721044 | 0.001081861 | 0.000458971 | 0.00429466  | 0.001639183 | 0.004556929 | 0.009835098 | 0.005737141 | 0.00036062  | 0.000196702 | 0.002589909 | 0.002163722 | 0.001934236 |
| OTU75  | 0.013572435 | 0.001147428 | 0.000655673 | 0.000721241 | 0.000852375 | 9.84E-05    | 0.000163918 | 9.84E-05    | 9.84E-05    | 0.000393404 | 0.003212799 | 0.015801724 | 0.000491755 | 0.001868669 | 0.000262269 |
| OTU55  | 0.018326666 | 0.001180212 | 0           | 0.00636003  | 0.009605613 | 0           | 0           | 0           | 0           | 0           | 0           | 0           | 0           | 3.28E-05    | 0           |
| OTU196 | 0.003343933 | 0.013146248 | 0           | 0.015014917 | 0.002786611 | 6.56E-05    | 0           | 0           | 0           | 0           | 0           | 0           | 0           | 6.56E-05    | 0           |
| OTU168 | 0.005442088 | 0.002655477 | 0.00036062  | 0.001114644 | 0.00304888  | 3.28E-05    | 0           | 3.28E-05    | 3.28E-05    | 3.28E-05    | 0.008851588 | 0.005704357 | 0.002130938 | 0.001475265 | 0.00098351  |
| OTU41  | 0.000131135 | 3.28E-05    | 0           | 0.000229486 | 3.28E-05    | 0.005147035 | 0.000163918 | 0.000754024 | 0.024391044 | 0.000458971 | 0           | 0           | 0.000163918 | 0           | 0           |
| OTU73  | 0.008031997 | 0.001311346 | 0.000655673 | 0.000524539 | 0.0166541   | 0.000491755 | 0.00036062  | 0.000524539 | 0.00036062  | 0.000262269 | 6.56E-05    | 0.000131135 | 0.000262269 | 0.000590106 | 0.000819592 |
| OTU103 | 0.005704357 | 0.001999803 | 6.56E-05    | 0.000491755 | 0.010195718 | 0           | 3.28E-05    | 0           | 0           | 0           | 0.004917549 | 3.28E-05    | 0.001212995 | 0.001016293 | 0.000524539 |

**Table S4: LEfSe analysis showed 24 specific species which had a significant difference between groups.**

|                                            | normal_1    | normal_2    | normal_3    | normal_4    | normal_5    | betaine_1   | betaine_2   | betaine_3   | betaine_4   | betaine_5   | model_1     | model_2     | model_3     | model_4     | model_5     |
|--------------------------------------------|-------------|-------------|-------------|-------------|-------------|-------------|-------------|-------------|-------------|-------------|-------------|-------------|-------------|-------------|-------------|
| <i>c_Epsilonproteobacteria</i>             | 0.070091466 | 0.00196702  | 0           | 0.012097171 | 0.015178835 | 0           | 0           | 3.28E-05    | 0           | 0           | 3.28E-05    | 0           | 3.28E-05    | 3.28E-05    | 0           |
| <i>c_Mollicutes</i>                        | 0.009769531 | 0.00403239  | 0.000196702 | 3.28E-05    | 0.015605022 | 0           | 0           | 0           | 0           | 0           | 0.000163918 | 6.56E-05    | 0.002229289 | 0.00062289  | 0.000819592 |
| <i>f_Anaeroplasmataceae</i>                | 0.009769531 | 0.00403239  | 0.000196702 | 3.28E-05    | 0.015605022 | 0           | 0           | 0           | 0           | 0           | 0.000163918 | 6.56E-05    | 0.002229289 | 0.00062289  | 0.000819592 |
| <i>f_Bacteroidaceae</i>                    | 0.02973478  | 0.079893781 | 0.03806183  | 0.03609481  | 0.052027669 | 0.044487427 | 0.022522375 | 0.021735567 | 0.02471888  | 0.014621513 | 0.006687867 | 0.008458184 | 0.010884175 | 0.014949349 | 0.023112481 |
| <i>f_Clostridiales_Incertae_Sedis_XIII</i> | 3.28E-05    | 6.56E-05    | 0.000131135 | 0.000229486 | 9.84E-05    | 0.000557322 | 0.000262269 | 0.000163918 | 0.001475265 | 0.000885159 | 6.56E-05    | 6.56E-05    | 0.00036062  | 0.000458971 | 0.000262269 |
| <i>f_Coriobacteriaceae</i>                 | 0.000262269 | 0.000163918 | 9.84E-05    | 0.000163918 | 6.56E-05    | 0.000262269 | 6.56E-05    | 0.000163918 | 0.000131135 | 0.000131135 | 0.000426188 | 0.000262269 | 0.00036062  | 0.000655673 | 0.000524539 |
| <i>f_Helicobacteraceae</i>                 | 0.070091466 | 0.00196702  | 0           | 0.012097171 | 0.015178835 | 0           | 0           | 3.28E-05    | 0           | 0           | 3.28E-05    | 0           | 3.28E-05    | 3.28E-05    | 0           |
| <i>f_Lachnospiraceae</i>                   | 0.364357604 | 0.226797364 | 0.12788906  | 0.405599449 | 0.31514933  | 0.202963643 | 0.246893748 | 0.192407304 | 0.254663476 | 0.285742386 | 0.61498869  | 0.62134872  | 0.50250795  | 0.313149526 | 0.330623217 |
| <i>f_Oxalobacteraceae</i>                  | 0           | 6.56E-05    | 0           | 0           | 0           | 3.28E-05    | 3.28E-05    | 0.000196702 | 3.28E-05    | 0.000196702 | 0           | 3.28E-05    | 0           | 3.28E-05    | 0           |
| <i>g_Anaeroplasma</i>                      | 0.009769531 | 0.00403239  | 0.000196702 | 3.28E-05    | 0.015605022 | 0           | 0           | 0           | 0           | 0           | 0.000163918 | 6.56E-05    | 0.002229289 | 0.00062289  | 0.000819592 |
| <i>g_Anaerovorax</i>                       | 3.28E-05    | 6.56E-05    | 0.000131135 | 0.000229486 | 9.84E-05    | 0.000557322 | 0.000262269 | 0.000163918 | 0.001475265 | 0.000885159 | 6.56E-05    | 6.56E-05    | 0.00036062  | 0.000458971 | 0.000262269 |
| <i>g_Bacteroides</i>                       | 0.02973478  | 0.079893781 | 0.03806183  | 0.03609481  | 0.052027669 | 0.044487427 | 0.022522375 | 0.021735567 | 0.02471888  | 0.014621513 | 0.006687867 | 0.008458184 | 0.010884175 | 0.014949349 | 0.023112481 |
| <i>g_Desulfovibrio</i>                     | 0.001606399 | 9.84E-05    | 0           | 0.00062289  | 0.001147428 | 0           | 0           | 0           | 0           | 0           | 0           | 0           | 0           | 0           | 0           |
| <i>g_Dorea</i>                             | 0.001409697 | 0.000393404 | 0.000295053 | 0.002065371 | 0.005343737 | 6.56E-05    | 0           | 0           | 9.84E-05    | 3.28E-05    | 0.001114644 | 0.000163918 | 0.000426188 | 0.000262269 | 0.000327837 |
| <i>g_Enterorhabdus</i>                     | 0.000131135 | 6.56E-05    | 3.28E-05    | 0           | 3.28E-05    | 0           | 0           | 3.28E-05    | 0           | 0           | 0.000163918 | 9.84E-05    | 9.84E-05    | 6.56E-05    | 6.56E-05    |
| <i>g_Helicobacter</i>                      | 0.070091466 | 0.00196702  | 0           | 0.012097171 | 0.015178835 | 0           | 0           | 3.28E-05    | 0           | 0           | 3.28E-05    | 0           | 3.28E-05    | 3.28E-05    | 0           |
| <i>g_Odoribacter</i>                       | 0.017309773 | 0.014260892 | 0.01530997  | 0.018194932 | 0.017408124 | 0.049568895 | 0.0266859   | 0.038455234 | 0.03439006  | 0.018883389 | 0.016686883 | 0.017768744 | 0.023604236 | 0.017309773 | 0.024751664 |
| <i>g_Parabacteroides</i>                   | 0.013211815 | 0.024161558 | 0.019932466 | 0.012031603 | 0.02839065  | 0.049339409 | 0.0100318   | 0.012621709 | 0.060125234 | 0.015146051 | 0.001147428 | 0.002229289 | 0.004753631 | 0.005704357 | 0.00429466  |
| <i>g_Paraprevotella</i>                    | 0.003999607 | 0.002655477 | 0           | 0.000295053 | 0.00636003  | 0           | 0           | 0           | 0           | 0           | 0           | 0           | 0           | 3.28E-05    | 3.28E-05    |
| <i>g_Prevotella</i>                        | 0.012785628 | 0.01639183  | 0.013211815 | 0.016981936 | 0.019735764 | 0.044094024 | 0.013539652 | 0.008425401 | 0.021473298 | 0.014228109 | 0.004097958 | 0.001278563 | 0.005179818 | 0.007310756 | 0.009703964 |
| <i>o_Anaeroplasmatales</i>                 | 0.009769531 | 0.00403239  | 0.000196702 | 3.28E-05    | 0.015605022 | 0           | 0           | 0           | 0           | 0           | 0.000163918 | 6.56E-05    | 0.002229289 | 0.00062289  | 0.000819592 |
| <i>o_Campylobacterales</i>                 | 0.070091466 | 0.00196702  | 0           | 0.012097171 | 0.015178835 | 0           | 0           | 3.28E-05    | 0           | 0           | 3.28E-05    | 0           | 3.28E-05    | 3.28E-05    | 0           |
| <i>o_Coriobacteriales</i>                  | 0.000262269 | 0.000163918 | 9.84E-05    | 0.000163918 | 6.56E-05    | 0.000262269 | 6.56E-05    | 0.000163918 | 0.000131135 | 0.000131135 | 0.000426188 | 0.000262269 | 0.00036062  | 0.000655673 | 0.000524539 |
| <i>p_Tenericutes</i>                       | 0.009769531 | 0.00403239  | 0.000196702 | 3.28E-05    | 0.015605022 | 0           | 0           | 0           | 0           | 0           | 0.000163918 | 6.56E-05    | 0.002229289 | 0.00062289  | 0.000819592 |



**Table S6: Each genus microbiome occupied the specific proportion of in each group feces.**

| tax_name                              | normal_1    | normal_2    | normal_3    | normal_4    | normal_5    | betaine_1   | betaine_2   | betaine_3   | betaine_4   | betaine_5   | model_1      | model_2     | model_3     | model_4     | model_5     |
|---------------------------------------|-------------|-------------|-------------|-------------|-------------|-------------|-------------|-------------|-------------|-------------|--------------|-------------|-------------|-------------|-------------|
| <i>Alistipes</i>                      | 26.12283023 | 22.02166055 | 22.60223048 | 19.00519673 | 24.85762413 | 6.960667461 | 21.41412195 | 24.00248271 | 5.111638178 | 36.75879397 | 16.71249618  | 17.09208856 | 11.15358478 | 30.88740868 | 20.07273462 |
| <i>Clostridium XIa</i>                | 2.615396591 | 5.316704956 | 5.310674456 | 10.78490923 | 0.304804684 | 14.35836313 | 12.78296889 | 13.17609505 | 24.66672119 | 0.716080402 | 11.10092677  | 17.37413623 | 31.09921848 | 7.2088526   | 20.38589757 |
| <i>Bacteroides</i>                    | 7.060014011 | 19.99507713 | 12.33138609 | 7.430653979 | 12.72960616 | 10.78267779 | 6.617859551 | 5.878701898 | 6.166680298 | 5.603015075 | 2.077604644  | 3.638414892 | 2.820251444 | 4.899011603 | 7.121931508 |
| <i>Barnesiella</i>                    | 1.120884253 | 14.448638   | 8.836962294 | 0.890868597 | 1.708510468 | 4.616607072 | 11.55958    | 12.66181947 | 3.099697391 | 6.444723618 | 8.432630614  | 9.462699196 | 3.975535168 | 8.594757198 | 10.31417315 |
| <i>Odoribacter</i>                    | 4.109908928 | 3.569084345 | 4.960169942 | 3.74569751  | 4.259244405 | 12.01430274 | 7.841248435 | 10.40078028 | 8.579373518 | 7.236180905 | 5.183827274  | 7.64349175  | 6.116207951 | 5.672539751 | 7.627033034 |
| <i>Parabacteroides</i>                | 3.136919125 | 6.046931408 | 6.457780138 | 2.47688466  | 6.946338333 | 11.95868097 | 2.9476929   | 3.413725838 | 14.99959107 | 5.804020101 | 0.356451777  | 0.958962065 | 1.231736323 | 1.869359691 | 1.323365997 |
| <i>Acetatifactor</i>                  | 0.646065229 | 4.922874959 | 1.922464153 | 5.028008369 | 0.393037619 | 0.365514501 | 7.571524901 | 3.165454868 | 5.20160301  | 3.316582915 | 16.315307063 | 3.187138626 | 10.00679579 | 3.255264289 | 4.192342661 |
| <i>Clostridium XIb</i>                | 4.288939052 | 0.943551034 | 1.030270844 | 9.482351353 | 3.007940964 | 1.040921732 | 2.2541181   | 1.028551162 | 3.01791118  | 1.582914573 | 12.67949893  | 8.574249048 | 7.849133537 | 1.708207993 | 1.636528942 |
| <i>Prevotella</i>                     | 3.035728186 | 4.102395799 | 4.280403611 | 3.495984342 | 4.828747894 | 10.68732618 | 3.978422117 | 2.278772832 | 5.35699681  | 5.452261307 | 1.273042061  | 0.549992949 | 1.342167856 | 2.395788569 | 2.99020103  |
| <i>Mucispirillum</i>                  | 3.121351288 | 0.196914998 | 0.159320234 | 10.86589728 | 0.513355258 | 6.801748113 | 1.001830267 | 2.340840575 | 4.612742292 | 1.520100503 | 3.961706895  | 4.202510224 | 3.533809038 | 0.408250967 | 0.848570563 |
| <i>Lachnospiraceae_incertae_sedis</i> | 1.299914377 | 1.706596652 | 1.678173128 | 3.799689546 | 2.911686853 | 4.862932062 | 1.406415567 | 2.996985281 | 5.618712685 | 0.766331658 | 3.85986353   | 1.45254548  | 2.038735984 | 4.641168887 | 3.242751793 |
| <i>Alloprevotella</i>                 | 4.172180276 | 3.142435182 | 11.25862985 | 1.113585746 | 2.21384455  | 0.039729837 | 1.261920817 | 2.358574215 | 0.44982416  | 1.256281407 | 0.468479479  | 0.564095332 | 2.514441047 | 5.296519123 | 4.96009698  |
| <i>Oscillibacter</i>                  | 3.798552191 | 0.968165409 | 0.870950611 | 2.071944388 | 3.400978583 | 5.29996027  | 4.257778634 | 0.895548856 | 2.723480821 | 2.135678392 | 2.057235971  | 3.525595826 | 2.217125382 | 1.708207993 | 0.919284776 |
| <i>Clostridium IV</i>                 | 4.911652526 | 1.173285199 | 0.350504514 | 4.562327057 | 8.109408839 | 1.867302344 | 1.233021867 | 2.207838269 | 0.245358633 | 0.427135678 | 2.32202872   | 4.385841207 | 1.29969419  | 1.299957026 | 1.00010102  |
| <i>Parasutterella</i>                 | 0.365844166 | 1.977354775 | 9.155602762 | 0.715394479 | 0.625651721 | 1.47794994  | 3.776129467 | 3.812732754 | 1.439437311 | 1.771356784 | 0.448110806  | 1.36793118  | 2.251104315 | 4.780833691 | 1.818365491 |
| <i>Flavonifractor</i>                 | 2.56869308  | 0.713816869 | 0.945300053 | 1.849227239 | 2.566776289 | 2.725466826 | 1.724304017 | 0.842347934 | 1.030506257 | 7.16080402  | 2.444240758  | 3.173036243 | 1.698946653 | 2.084228621 | 0.909182746 |
| <i>Helicobacter</i>                   | 16.64201759 | 0.492287496 | 0           | 2.490382669 | 3.713804444 | 0           | 0           | 0.00886682  | 0           | 0           | 0.010184336  | 0           | 0.008494733 | 0.010743446 | 0           |
| <i>Lactobacillus</i>                  | 0.326924574 | 2.166064982 | 1.030270844 | 0.526422353 | 0.296783508 | 0.476758045 | 0.443117233 | 0.576343323 | 0.114500695 | 0.615577889 | 2.403503412  | 4.56917219  | 0.399252463 | 4.437043404 | 1.080917264 |
| <i>Butyricoccus</i>                   | 2.12500973  | 0.213324582 | 0.116834838 | 0.998852669 | 1.227239913 | 0.190703218 | 0.5201811   | 0.611810605 | 0.588860718 | 0.175879397 | 2.260922701  | 1.946128896 | 1.163778457 | 0.923936399 | 1.060713203 |
| <i>Anaerotruncus</i>                  | 0.171246205 | 0.073843124 | 0.509824748 | 1.822231221 | 0.080211759 | 0.619785459 | 1.550910317 | 0.585210144 | 1.210435921 | 0.502512563 | 2.250738364  | 1.861514596 | 1.129799524 | 0.526428878 | 0.60612183  |
| <i>Other</i>                          | 8.359928388 | 5.808992452 | 6.192246415 | 6.843490585 | 15.30440363 | 2.852602304 | 5.856853868 | 6.756517113 | 5.765927865 | 10.75376884 | 3.381199715  | 4.470455507 | 6.150186884 | 7.39149119  | 7.889685827 |

WB original images

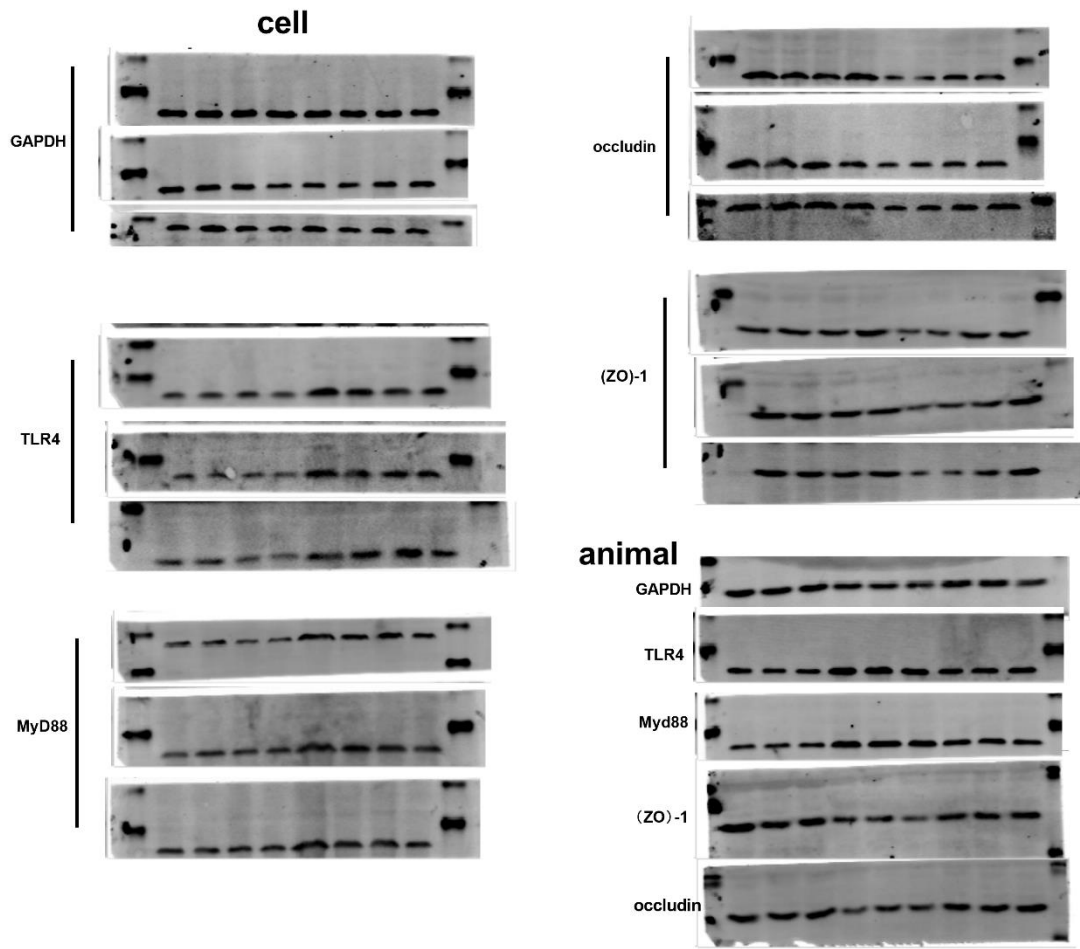

### WB original data

|                       |        |        |        |          |          |          |
|-----------------------|--------|--------|--------|----------|----------|----------|
| <b>animal</b>         | TLR4   | TLR4   | TLR4   | MyD88    | MyD88    | MyD88    |
| normal                | 0.67   | 0.69   | 0.65   | 0.56     | 0.53     | 0.58     |
| model                 | 1.32   | 1.33   | 1.36   | 1.57     | 1.54     | 1.48     |
| betaine               | 0.89   | 0.85   | 0.84   | 0.79     | 0.75     | 0.77     |
| <b>animal</b>         | (ZO)-1 | (ZO)-1 | (ZO)-1 | Occludin | Occludin | Occludin |
| normal                | 1.54   | 1.56   | 1.52   | 1.32     | 1.34     | 1.39     |
| model                 | 0.97   | 0.91   | 0.92   | 0.85     | 0.82     | 0.81     |
| betaine               | 1.34   | 1.32   | 1.35   | 1.09     | 1.05     | 1.03     |
| <b>cell</b>           | TLR4   | TLR4   | TLR4   | MyD88    | MyD88    | MyD88    |
| normal                | 0.72   | 0.73   | 0.71   | 0.32     | 0.28     | 0.22     |
| betaine only (low)    | 0.71   | 0.74   | 0.69   | 0.31     | 0.29     | 0.25     |
| betaine only (medium) | 0.7    | 0.74   | 0.68   | 0.33     | 0.26     | 0.28     |
| betaine only (high)   | 0.73   | 0.67   | 0.72   | 0.31     | 0.29     | 0.28     |
| model                 | 1.58   | 1.62   | 1.57   | 0.87     | 0.91     | 0.89     |
| betaine (low)         | 1.32   | 1.35   | 1.36   | 0.67     | 0.65     | 0.62     |
| betaine (medium)      | 1.21   | 1.23   | 1.18   | 0.52     | 0.51     | 0.53     |
| betaine (high)        | 0.98   | 1.01   | 0.95   | 0.41     | 0.45     | 0.42     |
| <b>cell</b>           | TLR4   | TLR4   | TLR4   | MyD88    | MyD88    | MyD88    |
| normal                | 0.72   | 0.73   | 0.71   | 0.32     | 0.28     | 0.22     |
| betaine only (low)    | 0.71   | 0.74   | 0.69   | 0.31     | 0.29     | 0.25     |
| betaine only (medium) | 0.7    | 0.74   | 0.68   | 0.33     | 0.26     | 0.28     |
| betaine only (high)   | 0.73   | 0.67   | 0.72   | 0.31     | 0.29     | 0.28     |
| model                 | 1.58   | 1.62   | 1.57   | 0.87     | 0.91     | 0.89     |
| betaine (low)         | 1.32   | 1.35   | 1.36   | 0.67     | 0.65     | 0.62     |
| betaine (medium)      | 1.21   | 1.23   | 1.18   | 0.52     | 0.51     | 0.53     |
| betaine (high)        | 0.98   | 1.01   | 0.95   | 0.41     | 0.45     | 0.42     |
